# Supplementary material for: Genomic Analysis of QTLs and Genes Altering Natural Variation in Stochastic Noise
Source: PLoS Genet. 2011 Sep 29;7(9):e1002295. doi: 10.1371/journal.pgen.1002295 (PMC3183082; doi:10.1371/journal.pgen.1002295)
Supplement: Table S1 — List of CV eQTL for transcriptomics analysis of Bay x Sha. (XLSX) [file pgen.1002295.s005.xlsx]

## Sheet: NonRedundantQTLs
Supplemental Table 2. Transcriptomics identified CV eQTL
Gene (AGI)	Chromosome	Marker	cM	LR	Additive	Dominance	R2	TR2	S
At2g42240	2	1	0.01	5.9055	-0.014	0	0.0255	0.1025	21.9876
At2g42240	3	5	18.19	8.3128	0.0167	0	0.0361	0.1025	21.997
At2g42240	5	5	20.82	10.3127	-0.0193	0	0.0485	0.106	22.2632
At2g42240	5	6	25.51	9.1105	-0.0184	0	0.0442	0.1017	21.9248
At2g42250	1	4	15.26	7.0857	0.0478	0	0.0309	0.0955	11.9594
At2g42250	1	6	29.24	4.1969	0.0373	0	0.0191	0.0836	13.6438
At2g42250	4	11	46.15	4.9885	0.0486	0	0.0217	0.0955	11.9542
At2g42250	4	14	60.91	9.2372	-0.0691	0	0.0405	0.0955	11.9599
At2g42250	5	17	85.45	6.5148	0.0522	0	0.0327	0.101	10.6628
At2g42270	2	1	2.01	6.5749	-0.0405	0	0.0314	0.0768	20.4161
At2g42270	2	10	44.44	4.5841	-0.0397	0	0.0235	0.06	23.2767
At2g42270	2	12	55.87	6.8571	-0.0525	0	0.0339	0.0704	19.265
At2g42270	3	9	36.87	3.911	-0.0298	0	0.017	0.0902	18.3354
At2g42280	1	12	51.31	6.0376	0.0272	0	0.0255	0.1229	4.1881
At2g42280	2	2	9.53	4.9796	-0.0262	0	0.0239	0.0931	4.4398
At2g42280	3	1	0.01	9.5632	-0.0343	0	0.0407	0.1229	4.1847
At2g42120	1	2	5.05	5.7847	-0.0141	0	0.0228	0.1818	34.556
At2g42120	1	4	15.26	5.8385	-0.0142	0	0.023	0.182	36.2735
At2g42120	1	7	31.84	6.1785	0.0182	0	0.027	0.209	45.1702
At2g42120	1	17	75.76	4.1529	0.0135	0	0.0159	0.1979	30.5395
At2g42120	1	19	89.52	28.4781	0.0417	0	0.1281	0.1886	35.6678
At2g42120	3	2	4.2	6.4992	-0.0149	0	0.0256	0.182	36.2591
At2g42120	5	3	11.82	4.8578	-0.0136	0	0.0207	0.1684	40.8013
At2g42120	5	6	25.51	8.9005	-0.0185	0	0.0393	0.187	36.4824
At2g42130	2	10	42.44	8.5543	-0.0097	0	0.038	0.0808	13.7823
At2g42130	2	12	53.87	9.9908	-0.0117	0	0.0539	0.0966	18.6946
At2g42130	4	12	54.61	6.6895	0.0089	0	0.032	0.0835	21.8998
At2g42130	5	6	25.51	4.21	0.0068	0	0.0208	0.1013	27.1567
At2g42130	5	15	73.51	5.1434	-0.0072	0	0.0229	0.0809	21.8763
At2g42150	1	13	56.6	4.1545	0.0318	0	0.0169	0.1516	4.4784
At2g42150	2	3	10.59	8.9432	0.0671	0	0.0392	0.0941	7.071
At2g42150	2	6	27.48	7.9039	-0.0557	0	0.0378	0.132	5.1231
At2g42150	3	6	22.4	9.0986	-0.0525	0	0.0381	0.1347	4.3543
At2g42150	3	9	38.87	14.4403	0.0732	0	0.0668	0.1455	4.0292
At2g42150	3	12	51.88	6.076	0.043	0	0.0282	0.1069	4.9307
At2g42160	1	11	46.63	5.3162	-0.019	0	0.0224	0.1211	25.981
At2g42160	2	5	21.97	8.2953	0.03	0	0.0404	0.1364	14.7793
At2g42160	2	10	42.44	10.6852	-0.0353	0	0.0463	0.1171	24.4054
At2g42160	5	2	4.75	7.2011	0.0222	0	0.0297	0.1432	16.5468
At2g42180	4	2	5.14	5.5015	0.0408	0	0.025	0.0541	2.9972
At2g42180	5	7	30.6	8.6026	-0.0496	0	0.044	0.0623	2.0264
At2g42100	1	22	99.88	7.0164	-0.05	0	0.0304	0.1192	2.5267
At2g42100	2	7	28.43	15.2287	-0.085	0	0.066	0.1184	2.4991
At2g42100	2	11	46.91	7.7051	0.0648	0	0.0328	0.1183	2.4971
At2g42100	3	8	32.93	4.905	-0.0415	0	0.0203	0.1386	1.3365
At2g42100	3	16	69.38	4.4376	0.0394	0	0.0187	0.1183	2.498
At2g42100	4	1	4.01	4.0085	-0.0464	0	0.018	0.1363	2.0984
At2g42100	4	6	24.04	5.1923	0.0429	0	0.022	0.1184	2.498
At2g42100	5	4	14.85	4.796	-0.0408	0	0.0199	0.1383	3.0818
At2g42220	1	3	12.36	4.0175	0.0098	0	0.0194	0.1043	138.088
At2g42220	1	6	25.24	11.014	0.0154	0	0.0466	0.1316	116.827
At2g42220	1	7	31.84	6.8226	0.0132	0	0.0322	0.1171	120.195
At2g42220	1	13	56.6	7.067	-0.0122	0	0.0296	0.1316	116.556
At2g42220	2	2	5.53	7.3677	0.0121	0	0.0309	0.1317	116.549
At2g42220	4	13	57.4	7.2302	0.0135	0	0.0339	0.1369	121.706
At2g42110	1	12	51.31	9.3179	0.054	0	0.0387	0.1436	3.9031
At2g42110	1	15	68.45	9.8487	0.0565	0	0.0435	0.1485	2.472
At2g42110	2	13	60.77	14.2367	0.0734	0	0.0652	0.149	3.5797
At2g42110	4	6	24.04	4.1342	-0.0358	0	0.017	0.1429	2.7303
At2g42110	5	8	39.59	7.2489	0.0505	0	0.0347	0.1497	2.6705
At2g42190	3	7	31.17	6.5368	-0.0233	0	0.0338	0.0694	72.4218
At2g42190	3	11	46.27	4.475	0.0182	0	0.0198	0.0754	68.3062
At2g42190	5	16	78.93	7.2206	0.0189	0	0.0322	0.0754	68.2843
At2g42210	1	2	9.05	4.486	-0.0117	0	0.0199	0.1688	27.7663
At2g42210	2	9	41.45	21.7263	-0.0269	0	0.0972	0.1743	26.8741
At2g42210	2	12	55.87	9.5191	-0.0187	0	0.0438	0.1209	41.7183
At2g42210	3	17	76.48	3.8869	0.0105	0	0.0162	0.1664	28.1785
At2g42210	5	5	18.82	12.1758	0.0185	0	0.0499	0.1665	27.9078
At2g42200	3	3	9.14	9.8132	-0.0314	0	0.0454	0.0454	5.222
At2g42200	3	5	22.19	7.2903	-0.0271	0	0.0342	0.0342	5.1443
At2g32950	1	2	5.05	6.5664	-0.0245	0	0.0275	0.1413	3.7955
At2g32950	1	4	17.26	6.4159	-0.0259	0	0.0296	0.1435	3.9515
At2g32950	1	13	56.6	7.5981	0.0264	0	0.0316	0.1399	4.121
At2g32950	2	2	7.53	4.9191	-0.0223	0	0.0219	0.1618	2.2748
At2g32950	2	10	42.44	8.502	-0.0299	0	0.0366	0.1145	3.6558
At2g32950	4	3	9.66	7.7726	0.0286	0	0.0323	0.1398	4.1242
At2g32940	2	10	44.44	6.3174	-0.051	0	0.0301	0.1386	3.9335
At2g32940	3	17	76.48	6.2476	-0.046	0	0.0281	0.1313	4.2396
At2g32940	4	10	42.32	7.789	-0.0507	0	0.0326	0.1329	4.126
At2g32940	5	6	25.51	6.2933	0.0477	0	0.0307	0.1232	5.0527
At2g32910	1	15	66.45	3.8628	0.0152	0	0.0154	0.1687	11.1666
At2g32910	2	13	56.77	6.7799	-0.0218	0	0.0267	0.1801	9.0691
At2g32910	3	11	48.27	5.3946	-0.0211	0	0.0253	0.1482	16.8464
At2g32910	3	13	58.54	7.1224	-0.0279	0	0.0332	0.156	13.2919
At2g32910	3	17	74.48	15.4638	0.0392	0	0.0644	0.1533	12.7061
At2g32910	4	14	60.91	7.3802	0.0224	0	0.0302	0.1533	12.6993
At2g32910	5	4	14.85	9.5202	0.0248	0	0.0396	0.154	12.7857
At2g32910	5	14	68.7	13.4821	-0.0294	0	0.0561	0.1537	12.6591
At2g32890	1	10	41.49	5.2681	0.0372	0	0.021	0.1737	2.1372
At2g32890	2	1	0.01	4.3536	-0.0342	0	0.0173	0.17	3.5121
At2g32890	2	9	37.45	7.1009	0.0448	0	0.029	0.1526	2.2571
At2g32890	4	2	5.14	4.8867	-0.0402	0	0.0199	0.1526	2.2558
At2g32890	4	11	48.15	5.5894	-0.0425	0	0.0254	0.1563	2.2371
At2g32890	4	17	76.59	11.4385	0.0586	0	0.0486	0.1513	2.2549
At2g32890	5	1	0.01	11.8419	0.0573	0	0.0489	0.1526	2.2564
At2g32880	2	7	28.43	7.7056	-0.0231	0	0.03	0.1932	3.701
At2g32880	2	12	51.87	9.0372	-0.0291	0	0.0361	0.1752	3.9799
At2g32880	2	14	62	13.6902	-0.0324	0	0.0541	0.1932	3.7006
At2g32880	4	17	74.59	7.6067	-0.0223	0	0.0296	0.1932	3.7019
At2g32880	5	6	27.51	10.2686	0.0276	0	0.0461	0.2022	4.28
At2g32880	5	7	30.6	9.7665	0.0266	0	0.0427	0.1988	3.9556
At2g32860	1	1	0.01	4.2	-0.022	0	0.0177	0.119	19.9613
At2g32860	1	3	10.36	4.7584	-0.0235	0	0.0201	0.1214	21.7568
At2g32860	1	12	53.31	4.7631	0.0249	0	0.0227	0.118	23.2625
At2g32860	1	14	63.51	6.4539	0.0281	0	0.0293	0.1246	22.4749
At2g32860	2	10	42.44	13.3566	-0.0419	0	0.0579	0.122	21.7439
At2g32860	2	12	55.87	8.0321	-0.0353	0	0.0394	0.1035	29.7258
At2g32860	5	3	9.82	5.0928	0.0242	0	0.0215	0.1214	21.7206
At2g32830	2	11	50.91	38.8309	-0.126	0	0.1781	0.2247	3.9685
At2g32830	3	3	9.14	7.1364	-0.0458	0	0.0275	0.1996	4.1372
At2g32830	5	8	33.59	5.09	0.0386	0	0.0196	0.1996	4.1487
At2g33030	2	14	64	4.1615	-0.0356	0	0.0195	0.1184	1.2616
At2g33030	3	15	68.5	8.454	-0.0478	0	0.0381	0.1192	1.496
At2g33030	4	15	67.15	13.3037	0.0636	0	0.0663	0.1278	1.3264
At2g33000	1	10	41.49	10.5366	-0.0511	0	0.0462	0.0987	5.6852
At2g33000	1	12	55.31	4.1435	-0.0357	0	0.0202	0.0728	4.2826
At2g33000	1	17	75.76	9.5203	0.0483	0	0.0416	0.0989	5.684
At2g33000	4	11	46.15	5.8164	-0.0369	0	0.0253	0.099	5.6888
At2g33000	4	13	59.4	6.0135	-0.0412	0	0.0299	0.1036	7.2123
At2g32990	2	10	42.44	3.8795	-0.0207	0	0.0172	0.0785	15.8781
At2g32990	3	17	74.48	7.05	0.0264	0	0.0319	0.0614	15.619
At2g32990	4	5	21.45	5.9384	-0.0258	0	0.0294	0.0649	14.8606
At2g33050	2	4	19.29	14.2296	-0.0283	0	0.0615	0.1775	20.2415
At2g33050	2	7	30.43	4.4769	-0.0167	0	0.0214	0.1373	26.1659
At2g33050	4	1	0.01	9.2571	0.0236	0	0.0371	0.1728	20.2881
At2g33050	4	15	67.15	4.5853	-0.0167	0	0.0201	0.1761	20.9346
At2g33050	5	1	2.01	7.5189	0.0214	0	0.0346	0.1801	23.5364
At2g33050	5	15	77.51	5.9837	-0.019	0	0.0265	0.1757	19.0253
At2g33020	1	4	17.26	5.2215	-0.0287	0	0.0235	0.2402	24.7771
At2g33020	1	9	37.83	4.8717	-0.0249	0	0.0179	0.2346	20.49
At2g33020	2	2	7.53	8.9823	-0.0379	0	0.0382	0.222	26.7486
At2g33020	2	9	39.45	11.6202	-0.0448	0	0.051	0.227	26.6692
At2g33020	2	11	48.91	9.2256	-0.042	0	0.0416	0.2176	24.4384
At2g33020	3	3	11.14	5.6984	0.0296	0	0.0239	0.2201	27.2927
At2g33020	3	9	38.87	15.9297	-0.0493	0	0.066	0.2229	29.2559
At2g33020	5	12	55.54	8.5781	0.0337	0	0.0325	0.2167	25.9346
At2g33010	1	6	25.24	6.6933	-0.0435	0	0.0306	0.0523	2.5988
At2g33010	5	10	46.02	5.0676	0.0376	0	0.023	0.0523	2.6009
At2g33040	2	9	39.45	5.8027	-0.0084	0	0.0306	0.049	11.8476
At2g33040	5	3	9.82	4.4259	0.0066	0	0.0203	0.0422	13.1109
At2g32980	1	18	79.79	4.9156	0.0118	0	0.0226	0.041	7.8621
At2g32980	5	15	73.51	3.991	-0.0107	0	0.0183	0.041	7.8653
At2g32970	2	1	0.01	4.3214	-0.0139	0	0.018	0.1284	13.0601
At2g32970	2	3	10.59	8.1187	-0.0187	0	0.0336	0.1439	10.3852
At2g32970	3	17	74.48	7.4557	0.0181	0	0.0308	0.144	10.3792
At2g32970	5	14	68.7	11.1514	-0.027	0	0.0477	0.121	12.3144
At2g32900	2	9	41.45	12.6065	-0.0362	0	0.058	0.1609	28.4234
At2g32900	3	3	9.14	9.8223	-0.0295	0	0.0419	0.1209	36.5816
At2g32900	3	15	66.5	4.527	0.0202	0	0.0198	0.1551	30.1907
At2g32900	5	13	68.48	4.1128	-0.0189	0	0.0171	0.1535	29.7947
At2g32900	5	18	87.76	5.1863	0.024	0	0.0206	0.1735	46.9221
At2g32930	1	12	51.31	10.8153	-0.0317	0	0.047	0.1061	10.0149
At2g32930	1	13	58.6	4.2952	-0.021	0	0.0209	0.08	13.3312
At2g32930	2	4	15.29	5.3473	-0.0222	0	0.0231	0.1007	12.435
At2g32930	2	7	28.43	6.6136	-0.0246	0	0.0285	0.1061	10.0127
At2g32930	3	16	71.38	6.2218	0.0251	0	0.0295	0.1098	10.3893
At2g32930	4	12	50.61	5.1144	0.0221	0	0.0219	0.1061	10.0092
At2g32920	1	2	5.05	6.8195	-0.0203	0	0.0273	0.1779	25.7861
At2g32920	2	2	9.53	8.1278	-0.0225	0	0.0337	0.1789	26.3417
At2g32920	4	2	5.14	14.2218	0.0327	0	0.0573	0.1774	25.7504
At2g32920	4	9	37.79	6.2687	-0.0196	0	0.0248	0.1774	25.7429
At2g32920	5	12	61.54	11.2486	0.0289	0	0.0549	0.1931	29.3663
At2g26640	1	17	75.76	5.8981	0.0176	0	0.0263	0.0721	39.5549
At2g26640	2	14	62	5.3459	-0.0177	0	0.0238	0.0721	39.5554
At2g26640	3	17	74.48	5.8614	0.0176	0	0.0261	0.0721	39.5488
At2g26740	2	5	21.97	5.9629	0.0188	0	0.0264	0.2643	103.582
At2g26740	2	10	42.44	39.5822	-0.0498	0	0.1538	0.255	119.243
At2g26740	4	4	18.7	13.2091	0.0307	0	0.0502	0.253	122.771
At2g26740	4	8	33.6	10.3999	-0.0264	0	0.0376	0.2558	118.155
At2g26740	5	10	46.02	6.3823	0.0159	0	0.0228	0.2559	117.967
At2g26740	5	12	59.54	5.1092	0.0159	0	0.0228	0.256	120.491
At2g26770	1	2	5.05	4.5325	-0.0183	0	0.019	0.1281	24.2571
At2g26770	1	4	19.26	5.5602	-0.0214	0	0.0249	0.1341	26.784
At2g26770	1	13	56.6	4.0466	0.0175	0	0.0169	0.128	25.3359
At2g26770	1	16	72.5	5.5918	0.0217	0	0.0263	0.1374	24.7056
At2g26770	2	2	7.53	6.8892	-0.0233	0	0.0311	0.1383	27.5008
At2g26770	3	14	61.81	10.2235	0.0291	0	0.0471	0.1237	30.7743
At2g26770	3	17	74.48	13.1281	0.0316	0	0.0557	0.1323	26.4974
At2g26770	4	4	16.7	5.9022	0.0228	0	0.028	0.137	16.2884
At2g26780	2	6	23.48	4.3669	-0.014	0	0.0186	0.1122	8.0878
At2g26780	2	9	39.45	6.0259	-0.0178	0	0.0275	0.1211	9.4283
At2g26780	3	10	43.59	5.9027	-0.0179	0	0.0277	0.1216	9.6489
At2g26780	3	16	71.38	8.174	0.0208	0	0.0388	0.1239	9.004
At2g26780	4	2	5.14	7.0342	0.02	0	0.0299	0.1173	9.514
At2g26780	5	6	23.51	4.5474	-0.0145	0	0.0192	0.1173	9.5125
At2g26650	1	3	10.36	11.761	-0.0629	0	0.0507	0.1272	3.5314
At2g26650	1	4	17.26	6.8581	-0.0519	0	0.0335	0.1101	4.4334
At2g26650	1	13	58.6	5.402	0.0438	0	0.0248	0.1299	3.3262
At2g26650	2	3	10.59	3.9117	-0.0353	0	0.0163	0.1265	3.5211
At2g26650	2	9	37.45	12	0.0663	0	0.0483	0.1749	2.5838
At2g26650	2	11	50.91	8.6116	0.0598	0	0.0379	0.1644	2.747
At2g26650	3	13	56.54	5.6564	0.0443	0	0.0251	0.1517	2.3012
At2g26650	5	7	28.6	8.3029	0.052	0	0.0352	0.1268	3.5259
At2g26660	2	6	23.48	4.2175	-0.0103	0	0.018	0.108	77.6008
At2g26660	2	9	39.45	8.843	-0.0163	0	0.0417	0.1317	56.5752
At2g26660	3	17	74.48	8.9772	0.015	0	0.038	0.1259	56.4518
At2g26660	5	5	18.82	14.0041	0.0191	0	0.0604	0.1263	56.6113
At2g26660	5	7	30.6	8.1538	0.0158	0	0.0419	0.1078	58.169
At2g26690	2	10	42.44	19.6042	-0.0255	0	0.0786	0.2017	5.6688
At2g26690	2	12	55.87	12.0281	-0.0214	0	0.0529	0.1761	12.3793
At2g26690	3	1	0.01	7.1812	-0.0179	0	0.0277	0.2006	5.6308
At2g26690	3	4	14.28	13.1935	0.0248	0	0.0526	0.2027	5.484
At2g26690	3	14	59.81	7.0258	-0.0168	0	0.027	0.2006	5.6348
At2g26690	3	17	76.48	21.2731	0.0311	0	0.0917	0.2136	5.1938
At2g26700	1	12	51.31	3.9812	0.0378	0	0.0169	0.1127	3.5652
At2g26700	3	11	46.27	6.8216	-0.0517	0	0.0298	0.0954	1.7809
At2g26700	3	14	59.81	10.908	-0.0736	0	0.0471	0.1127	3.5613
At2g26700	3	17	76.48	4.6381	0.0492	0	0.0208	0.1134	3.5912
At2g26700	4	8	33.6	7.3868	-0.0517	0	0.0316	0.1127	3.5616
At2g26700	5	6	25.51	6.2028	0.0498	0	0.0302	0.1103	3.8708
At2g26700	5	8	35.59	7.9159	0.0571	0	0.039	0.119	3.3324
At2g26710	2	8	32.43	8.4116	-0.036	0	0.0394	0.0394	43.3374
At2g26720	3	3	9.14	3.8809	-0.0257	0	0.0178	0.0407	5.5188
At2g26720	4	11	46.15	4.8833	-0.0295	0	0.0229	0.0229	6.3712
At2g26680	1	18	79.79	5.509	0.0124	0	0.0231	0.1248	19.7741
At2g26680	1	22	101.88	11.4145	-0.0183	0	0.0502	0.1268	19.6579
At2g26680	2	12	51.87	4.845	-0.0119	0	0.021	0.0935	24.8868
At2g26680	3	17	76.48	5.9372	0.0121	0	0.0265	0.1266	19.3582
At2g26760	1	19	87.52	9.1953	0.0519	0	0.0428	0.1223	8.2699
At2g26760	1	21	98.93	11.6629	0.0577	0	0.0527	0.1322	9.6926
At2g26760	2	9	37.45	14.474	0.0637	0	0.0619	0.1293	9.6032
At2g26760	2	11	48.91	11.3446	0.0647	0	0.056	0.1234	8.9345
At2g26760	5	17	85.45	5.2778	-0.039	0	0.0231	0.1307	9.4148
At2g26730	2	3	12.59	12.6903	-0.0235	0	0.0572	0.1421	11.4884
At2g26730	2	6	27.48	5.8526	-0.0159	0	0.0261	0.111	14.8984
At2g26730	3	16	71.38	7.0822	0.0171	0	0.0303	0.1601	8.0583
At2g26730	5	6	23.51	4.2061	-0.0145	0	0.017	0.1567	7.8154
At2g26730	5	9	42.19	9.4363	0.0219	0	0.0386	0.1566	7.8159
At2g26730	5	11	53.75	5.0745	0.016	0	0.0238	0.1417	6.178
At2g39640	2	9	39.45	6.3122	-0.0489	0	0.0349	0.0863	2.9486
At2g39640	2	12	55.87	11.3843	0.0634	0	0.0551	0.0847	2.6933
At2g39640	3	16	69.38	7.5873	-0.0405	0	0.0337	0.0785	2.6409
At2g39680	3	5	20.19	3.8463	0.0248	0	0.0184	0.1178	65.4872
At2g39680	3	8	32.93	5.1707	-0.022	0	0.0223	0.0994	79.7973
At2g39680	4	4	16.7	11.3699	-0.0355	0	0.0559	0.1346	43.1071
At2g39680	5	14	68.7	11.1964	-0.0324	0	0.0479	0.121	52.9572
At2g39690	2	13	56.77	11.468	0.0596	0	0.0496	0.111	29.302
At2g39690	3	13	56.54	10.782	0.057	0	0.0519	0.1204	29.1221
At2g39690	3	15	66.5	5.9941	0.0417	0	0.0282	0.0966	23.9832
At2g39690	5	9	42.19	4.6323	-0.0348	0	0.0197	0.1109	29.2979
At2g39650	1	21	92.93	7.0971	0.0193	0	0.026	0.2409	11.9054
At2g39650	2	6	25.48	16.1833	-0.033	0	0.0675	0.2506	11.3057
At2g39650	2	11	50.91	13.2098	-0.0324	0	0.0558	0.2481	9.7612
At2g39650	2	15	66.77	4.092	0.0179	0	0.0146	0.2555	9.6909
At2g39650	3	2	4.2	6.198	-0.018	0	0.0226	0.241	11.9086
At2g39650	3	13	58.54	12.3401	0.0268	0	0.0491	0.2457	11.4365
At2g39650	3	16	73.38	8.9702	0.0227	0	0.0354	0.232	15.9141
At2g39660	2	1	0.01	5.5372	-0.0165	0	0.0243	0.0848	165.479
At2g39660	3	12	51.88	5.5958	0.0173	0	0.0268	0.089	158.924
At2g39660	5	9	44.19	3.9652	0.0152	0	0.0209	0.0725	172.848
At2g39660	5	12	55.54	7.5148	0.0192	0	0.0332	0.0848	165.518
At2g39700	3	16	69.38	6.5273	0.0282	0	0.029	0.0764	21.241
At2g39700	5	7	30.6	12.5631	0.0426	0	0.0662	0.0928	20.9174
At2g39705	1	1	0.01	5.9198	-0.0238	0	0.0267	0.063	21.1195
At2g39705	1	3	12.36	7.7411	-0.0281	0	0.0371	0.0734	24.9892
At2g39705	4	14	64.91	8.2874	-0.0288	0	0.0378	0.0698	23.9074
At2g39710	2	2	9.53	10.8695	-0.0268	0	0.0461	0.2385	14.4081
At2g39710	2	9	41.45	16.9288	-0.0355	0	0.0713	0.2415	14.2363
At2g39710	2	12	53.87	6.7199	-0.0228	0	0.0298	0.2	14.8415
At2g39710	3	14	59.81	18.5729	0.0324	0	0.0708	0.2303	15.0518
At2g39710	5	15	75.51	5.3152	0.0183	0	0.0224	0.235	14.2844
At2g39670	1	1	0.01	4.6982	-0.021	0	0.0175	0.2232	31.4545
At2g39670	2	1	0.01	6.8703	-0.026	0	0.0269	0.1883	30.2334
At2g39670	2	3	10.59	11.4495	-0.0346	0	0.0443	0.2057	30.0027
At2g39670	2	7	28.43	4.4344	0.0269	0	0.0165	0.2222	19.6438
At2g39670	2	10	42.44	5.629	-0.0257	0	0.0215	0.2056	29.9886
At2g39670	3	15	64.5	8.1444	0.0281	0	0.0312	0.2057	29.9807
At2g39670	3	17	76.48	6.3183	0.0251	0	0.0251	0.1995	23.8943
At2g39670	4	3	13.66	15.2246	0.0515	0	0.0646	0.2048	32.3233
At2g39670	4	7	28.68	14.5004	-0.0474	0	0.0565	0.2056	30.0063
At2g30730	1	9	37.83	4.6825	-0.039	0	0.0202	0.0981	0.3588
At2g30730	4	1	4.01	6.4908	0.0527	0	0.0313	0.102	0.4484
At2g30730	4	14	64.91	4.6938	-0.0407	0	0.0214	0.0698	0.267
At2g30740	1	9	37.83	4.4058	0.0129	0	0.0161	0.2351	1063.11
At2g30740	1	11	48.63	4.5305	0.0156	0	0.0235	0.2425	954.23
At2g30740	2	3	10.59	4.1229	-0.0131	0	0.0154	0.2189	1024.15
At2g30740	2	10	46.44	31.4465	-0.0425	0	0.1408	0.2591	559.284
At2g30740	2	13	58.77	11.3899	-0.0245	0	0.0501	0.1683	792.409
At2g30740	4	15	65.15	10.4968	-0.0222	0	0.0398	0.2189	1024.07
At2g30740	5	6	27.51	5.961	0.0162	0	0.0258	0.2241	1008.16
At2g30740	5	8	37.59	4.177	0.0143	0	0.0199	0.2182	929.831
At2g30740	5	18	87.76	5.4138	0.0151	0	0.0203	0.2185	976.037
At2g30750	1	15	66.45	8.2553	0.0382	0	0.0309	0.2265	10.5207
At2g30750	1	18	83.79	11.0383	-0.0498	0	0.0495	0.2347	9.0459
At2g30750	1	20	92.37	7.6397	-0.0352	0	0.03	0.2152	11.9554
At2g30750	2	1	0.01	18.2451	-0.0514	0	0.0714	0.2096	18.1875
At2g30750	2	4	15.29	22.8167	-0.0584	0	0.0884	0.2265	10.5364
At2g30750	2	14	64	6.644	-0.0344	0	0.0284	0.2316	11.7702
At2g30750	3	2	6.2	12.697	0.0441	0	0.052	0.2334	11.622
At2g30760	1	13	56.6	4.5744	0.0391	0	0.021	0.041	3.5546
At2g30760	3	5	18.19	3.8568	0.0354	0	0.0174	0.0584	2.963
At2g30760	4	15	65.15	5.2421	0.0427	0	0.0241	0.0411	3.5561
At2g30770	2	10	44.44	32.3649	-0.0986	0	0.1528	0.2117	3.0442
At2g30770	3	6	22.4	4.4189	-0.0311	0	0.0175	0.1749	2.333
At2g30770	5	6	25.51	4.0973	0.0317	0	0.0183	0.1559	2.5793
At2g30770	5	8	35.59	9.5325	0.0494	0	0.0442	0.1819	2.3291
At2g30780	1	21	92.93	4.0703	0.0271	0	0.0182	0.0647	30.7236
At2g30780	2	8	32.43	12.6536	0.0513	0	0.0556	0.102	32.4072
At2g30780	2	11	46.91	10.8906	0.0486	0	0.048	0.0944	26.5058
At2g30780	2	12	55.87	7.0386	0.0395	0	0.033	0.0795	29.0902
At2g30780	5	3	9.82	8.3836	0.0392	0	0.0387	0.0464	35.1648
At2g30790	2	3	12.59	5.6797	0.019	0	0.0262	0.1181	6.4403
At2g30790	2	10	42.44	13.4205	-0.0304	0	0.0582	0.1149	7.9255
At2g30790	2	12	53.87	4.5119	-0.0191	0	0.0245	0.0812	6.9968
At2g30790	5	5	18.82	7.7921	0.0204	0	0.0336	0.1155	7.9755
At2g30790	5	7	30.6	5.4587	0.0175	0	0.0251	0.107	9.8364
At2g30790	5	19	92.94	5.9925	-0.0182	0	0.0255	0.1151	7.9675
At2g30800	2	3	10.59	7.5689	-0.0301	0	0.0306	0.1626	17.887
At2g30800	2	10	42.44	13.588	-0.0436	0	0.0568	0.1647	17.4934
At2g30800	3	1	0.01	4.3642	0.0218	0	0.0175	0.1626	17.8738
At2g30800	5	3	9.82	6.2734	0.0265	0	0.0253	0.1626	17.8825
At2g30800	5	10	46.02	5.7105	-0.0254	0	0.023	0.1626	17.8865
At2g30650	1	12	51.31	8.4522	-0.0504	0	0.0359	0.1233	3.1596
At2g30650	1	19	85.52	3.9514	0.0351	0	0.0163	0.1395	3.4328
At2g30650	3	7	27.17	4.86	0.0444	0	0.0204	0.1233	3.1581
At2g30650	3	11	46.27	9.6186	-0.0633	0	0.0409	0.1233	3.1631
At2g30650	3	13	58.54	5.4541	-0.0455	0	0.0257	0.1081	3.2319
At2g30650	5	5	18.82	4.2826	-0.0363	0	0.0184	0.1023	5.1305
At2g30660	5	13	66.48	6.025	0.0349	0	0.0282	0.0282	13.9348
At2g30670	2	12	51.87	6.0612	-0.0332	0	0.0277	0.0483	15.9962
At2g30670	2	14	62	5.8207	0.0398	0	0.0259	0.0743	13.7874
At2g30670	3	15	64.5	5.1877	0.0277	0	0.0228	0.0822	16.2138
At2g30680	2	5	19.97	12.9154	0.0731	0	0.0548	0.1314	6.6246
At2g30680	2	8	36.43	13.6804	-0.0896	0	0.0643	0.1348	6.3949
At2g30680	2	12	53.87	6.7025	0.0635	0	0.0335	0.1379	6.7605
At2g30680	3	2	4.2	6.1743	0.0444	0	0.0258	0.1314	6.6273
At2g30680	3	13	58.54	4.8426	-0.0415	0	0.0222	0.134	6.7089
At2g30680	4	15	65.15	4.1369	-0.0368	0	0.0169	0.1483	5.9215
At2g30690	1	20	90.37	3.8415	-0.0296	0	0.0176	0.0391	24.7864
At2g30690	1	22	101.88	4.1632	-0.0321	0	0.0208	0.0422	25.79
At2g30690	4	8	33.6	4.254	-0.0312	0	0.0196	0.041	27.4702
At2g30640	2	9	37.45	4.5406	0.0297	0	0.0182	0.1653	39.6406
At2g30640	2	12	51.87	6.32	0.0379	0	0.0252	0.1723	41.2177
At2g30640	3	1	0.01	9.7514	0.043	0	0.0392	0.1723	41.2256
At2g30640	3	3	11.14	4.5633	0.0308	0	0.0199	0.1531	42.3921
At2g30640	3	14	59.81	12.8067	0.0499	0	0.0518	0.1723	41.2285
At2g30640	4	3	11.66	10.4471	0.0488	0	0.045	0.177	43.628
At2g30640	4	8	35.6	6.0146	-0.0402	0	0.0257	0.198	32.2311
At2g30640	5	1	0.01	4.6799	-0.0296	0	0.0182	0.1905	33.076
At2g30640	5	12	59.54	5.4858	0.0362	0	0.0277	0.1813	43.441
At2g30710	2	9	37.45	4.9571	0.0139	0	0.0227	0.046	41.8782
At2g30710	3	17	76.48	5.9679	0.0152	0	0.0284	0.0754	43.3215
At2g30695	1	17	75.76	4.008	0.011	0	0.0182	0.0477	35.7691
At2g30695	5	14	70.7	5.911	-0.0145	0	0.032	0.0552	38.0943
At2g42000	2	4	15.29	4.7325	0.0397	0	0.021	0.0737	2.5909
At2g42000	3	17	76.48	4.6795	-0.0408	0	0.0223	0.0767	2.8544
At2g42000	5	2	8.75	5.9153	-0.0459	0	0.028	0.0759	2.4503
At2g41990	1	2	7.05	10.8929	-0.0473	0	0.049	0.1672	5.2051
At2g41990	1	3	12.36	9.5728	-0.0453	0	0.0447	0.1628	5.7701
At2g41990	2	3	10.59	5.0896	-0.0317	0	0.0208	0.1463	5.7465
At2g41990	2	6	23.48	8.9873	-0.0447	0	0.0365	0.162	4.8848
At2g41990	2	11	46.91	14.0862	0.0613	0	0.0579	0.162	4.8813
At2g41990	2	12	53.87	7.598	0.0456	0	0.0351	0.1392	4.4227
At2g41990	3	14	59.81	7.7824	0.0383	0	0.0319	0.1515	5.7937
At2g41990	3	17	74.48	10.4007	0.0436	0	0.0424	0.162	4.8789
At2g41990	4	1	2.01	5.3843	0.0362	0	0.025	0.1662	4.6192
At2g41980	2	3	10.59	6.9634	-0.0312	0	0.0318	0.0528	26.022
At2g41980	2	5	21.97	4.3442	-0.0324	0	0.0237	0.049	44.6362
At2g41980	4	17	74.59	6.7403	-0.0306	0	0.0301	0.0711	28.1918
At2g41970	1	10	41.49	6.6925	-0.0466	0	0.0285	0.1141	0.9503
At2g41970	3	3	9.14	6.9575	-0.0492	0	0.0316	0.059	0.9597
At2g41970	3	7	27.17	7.9637	0.0642	0	0.0355	0.0777	1.3492
At2g41970	4	3	9.66	5.5718	0.0452	0	0.0231	0.1373	0.6291
At2g41970	5	7	28.6	4.8181	0.0391	0	0.02	0.1342	1.0867
At2g41960	1	14	61.51	11.5917	0.0327	0	0.0427	0.245	6.5312
At2g41960	1	16	72.5	4.0593	0.0201	0	0.0164	0.2187	6.1267
At2g41960	2	2	7.53	7.0515	-0.0266	0	0.027	0.272	6.4749
At2g41960	2	10	42.44	24.9575	-0.0515	0	0.0953	0.2455	6.5382
At2g41960	2	12	55.87	9.1054	-0.0337	0	0.039	0.1891	9.5933
At2g41960	3	2	4.2	8.3054	-0.0274	0	0.0303	0.245	6.5292
At2g41960	3	13	54.54	14.1269	0.0364	0	0.0523	0.2451	6.5387
At2g41960	3	14	61.81	9.8187	0.0319	0	0.0406	0.2333	6.1392
At2g41960	5	6	23.51	8.6036	-0.028	0	0.0314	0.245	6.534
At2g41930	2	1	0.01	14.0918	0.067	0	0.0643	0.0692	3.8351
At2g41930	2	7	28.43	4.7468	-0.0386	0	0.0212	0.0692	3.8376
At2g41930	2	11	48.91	3.8753	0.044	0	0.0204	0.0896	4.1914
At2g41930	5	11	53.75	3.8776	0.0344	0	0.0185	0.0876	3.0998
At2g42090	1	10	41.49	4.9501	0.0404	0	0.0214	0.1006	3.5127
At2g42090	1	13	56.6	8.2682	0.0518	0	0.0354	0.1146	3.6263
At2g42090	4	5	19.45	10.3399	-0.0599	0	0.0445	0.1146	3.6275
At2g42090	4	7	32.68	10.1082	-0.0617	0	0.0481	0.1182	4.3088
At2g42090	5	3	9.82	8.3303	0.0527	0	0.0357	0.1146	3.6242
At2g42090	5	19	92.94	5.1541	0.0426	0	0.0219	0.1146	3.6242
At2g41950	1	3	10.36	6.8647	-0.0181	0	0.0276	0.1771	64.3742
At2g41950	2	9	39.45	16.9682	-0.0309	0	0.0752	0.1846	63.9788
At2g41950	2	11	48.91	8.1684	-0.0235	0	0.0395	0.149	76.952
At2g41950	3	3	11.14	4.9238	-0.0159	0	0.0212	0.1734	82.8464
At2g41950	3	6	22.4	6.1628	-0.0173	0	0.0244	0.1766	64.2879
At2g41950	3	14	61.81	14.2315	0.0282	0	0.0633	0.1893	61.7331
At2g41950	4	13	55.4	4.6081	0.0159	0	0.0182	0.1766	64.2845
At2g42060	1	7	29.84	4.7573	-0.0405	0	0.0195	0.1478	6.6306
At2g42060	1	13	58.6	6.0576	0.0558	0	0.0302	0.1447	6.1034
At2g42050	3	13	54.54	4.0246	0.0385	0	0.0184	0.0465	4.0005
At2g42050	5	18	91.76	7.0893	0.054	0	0.035	0.0496	3.7869
At2g41890	2	10	42.44	10.6514	-0.0299	0	0.0483	0.0727	14.2684
At2g41890	2	12	55.87	6.9162	-0.0256	0	0.034	0.0583	9.8928
At2g41890	4	15	65.15	6.1583	-0.0217	0	0.0275	0.0724	14.2739
At2g42040	1	3	12.36	7.532	-0.0343	0	0.0357	0.1208	4.9359
At2g42040	1	12	51.31	4.2312	0.0239	0	0.018	0.1134	5.3283
At2g42040	2	2	7.53	7.5335	-0.0337	0	0.0365	0.12	5.1674
At2g42040	2	5	21.97	5.0356	-0.0273	0	0.0239	0.1074	5.9691
At2g42040	3	12	53.88	10.7165	0.0393	0	0.0482	0.1165	5.3951
At2g42040	3	15	68.5	5.1141	0.0273	0	0.0235	0.0917	5.8802
At2g42070	5	3	11.82	4.2081	-0.0089	0	0.0229	0.0229	14.7234
At2g41900	2	1	0.01	6.5523	-0.0213	0	0.0271	0.1405	24.8793
At2g41900	2	3	12.59	11.3764	-0.0313	0	0.0532	0.1665	23.0107
At2g41900	2	10	42.44	4.5686	-0.0195	0	0.0184	0.1589	22.8431
At2g41900	3	17	74.48	8.9994	0.0246	0	0.0365	0.1613	22.0324
At2g41900	4	5	21.45	7.4799	0.0247	0	0.0356	0.1663	24.0858
At2g41900	5	8	41.59	3.9394	0.0166	0	0.0166	0.1757	19.2254
At2g41940	2	3	12.59	4.6544	-0.0145	0	0.0208	0.1433	29.5538
At2g41940	2	12	53.87	15.6057	-0.0296	0	0.0743	0.1562	26.3783
At2g41940	3	17	74.48	11.427	0.0215	0	0.0478	0.1404	29.0542
At2g42010	1	7	31.84	5.404	-0.0316	0	0.0242	0.1602	20.3083
At2g42010	1	10	43.49	8.9948	-0.0434	0	0.0421	0.1781	19.224
At2g42010	1	15	70.45	5.0761	0.0284	0	0.0211	0.136	18.251
At2g42010	2	2	9.53	7.5883	-0.0359	0	0.0338	0.1388	18.8255
At2g42010	2	5	21.97	5.7641	-0.0321	0	0.027	0.1321	18.6884
At2g42010	3	7	29.17	8.4762	-0.0398	0	0.0413	0.1456	19.5446
At2g42010	3	17	76.48	9.5608	0.04	0	0.0407	0.1366	18.5338
At2g42010	4	13	55.4	5.5332	0.0322	0	0.023	0.136	18.2548
At2g41880	2	2	9.53	27.6664	-0.0281	0	0.1203	0.2143	6.0752
At2g41880	2	5	21.97	17.5714	-0.0232	0	0.0805	0.1744	10.7168
At2g41880	3	8	32.93	6.8796	-0.0134	0	0.0265	0.1991	7.3991
At2g41880	3	16	69.38	7.4876	0.014	0	0.0289	0.1992	7.4008
At2g41880	5	7	32.6	8.873	-0.0181	0	0.0378	0.1967	7.2292
At2g41880	5	11	49.75	5.0629	0.0131	0	0.0194	0.1991	7.4012
At2g41870	2	8	32.43	5.1197	-0.019	0	0.0224	0.0859	48.4753
At2g41870	2	10	42.44	11.8685	-0.0305	0	0.0515	0.1149	36.536
At2g41870	5	4	16.85	10.7105	0.0279	0	0.0489	0.1194	35.854
At2g41870	5	18	87.76	6.0467	-0.0207	0	0.0257	0.1147	36.3216
At2g42030	2	2	9.53	9.9208	-0.0225	0	0.0458	0.1128	41.4535
At2g42030	2	14	64	5.3406	-0.018	0	0.0264	0.1157	40.2918
At2g42030	3	13	56.54	8.5294	0.0217	0	0.0414	0.1158	37.4975
At2g32760	3	4	16.28	8.6425	-0.0174	0	0.0411	0.0829	13.9889
At2g32760	3	13	54.54	6.0965	0.014	0	0.027	0.0787	14.6002
At2g32760	4	9	37.79	4.2352	0.0117	0	0.0187	0.0787	14.5864
At2g32760	5	18	87.76	5.7508	-0.0141	0	0.0255	0.0787	14.5748
At2g32750	5	2	4.75	6.3175	-0.0512	0	0.0295	0.0295	7.7601
At2g32740	2	1	0.01	4.2536	-0.0398	0	0.0195	0.0408	3.128
At2g32740	2	4	15.29	5.6179	0.0536	0	0.0252	0.0661	2.1774
At2g32740	3	2	6.2	4.9345	0.0443	0	0.024	0.0694	1.9916
At2g32730	1	10	45.49	5.4318	-0.0233	0	0.0229	0.1833	18.3655
At2g32730	1	13	60.6	4.9517	0.0193	0	0.0208	0.1597	24.5896
At2g32730	2	10	42.44	28.3047	-0.0489	0	0.1158	0.2021	11.7666
At2g32730	2	12	55.87	14.4246	-0.0381	0	0.067	0.1533	13.0839
At2g32730	3	17	74.48	3.9477	0.0165	0	0.0148	0.2154	10.2996
At2g32730	4	4	14.7	4.3671	0.018	0	0.0164	0.2169	11.6719
At2g32730	4	14	60.91	4.9005	0.019	0	0.0184	0.2189	8.9446
At2g32730	5	4	14.85	4.0173	0.0168	0	0.0152	0.2158	13.177
At2g32730	5	15	73.51	10.8636	-0.0278	0	0.0423	0.2007	11.6604
At2g32720	2	1	0.01	4.6797	-0.014	0	0.0212	0.0547	64.8137
At2g32720	2	10	42.44	3.8963	-0.0138	0	0.0179	0.0407	67.8783
At2g32720	2	13	58.77	7.2818	-0.0197	0	0.0366	0.0593	66.1846
At2g32720	3	15	64.5	3.8488	0.0127	0	0.0171	0.0718	50.8141
At2g32690	1	1	0.01	4.7199	0.0288	0	0.0179	0.2103	0.0687
At2g32690	1	9	37.83	7.3423	-0.0352	0	0.0286	0.1924	0.1534
At2g32690	2	6	23.48	6.7842	0.0388	0	0.0264	0.1924	0.1542
At2g32690	2	10	42.44	13.5165	-0.0598	0	0.0553	0.1964	0.265
At2g32690	2	11	50.91	5.2671	-0.0372	0	0.0235	0.1647	1.0544
At2g32690	3	2	4.2	14.0248	0.0493	0	0.0555	0.1924	0.1529
At2g32690	3	11	46.27	4.166	-0.0265	0	0.0158	0.2082	0.4305
At2g32690	5	11	51.75	15.3043	0.0543	0	0.0663	0.2045	0.0265
At2g32680	1	13	60.6	5.7654	0.0285	0	0.0229	0.2068	118.204
At2g32680	2	9	41.45	42.2357	-0.0854	0	0.1852	0.2586	45.4696
At2g32680	2	12	55.87	28.9035	-0.0727	0	0.127	0.2003	61.1021
At2g32680	2	13	60.77	7.9192	-0.0398	0	0.0316	0.2686	38.543
At2g32680	5	7	32.6	13.1255	0.0446	0	0.055	0.247	48.1505
At2g32670	5	6	23.51	4.0566	-0.0285	0	0.0166	0.1469	15.2758
At2g32670	5	15	77.51	11.868	0.065	0	0.0595	0.1137	11.1565
At2g32670	5	16	82.93	7.4211	0.0443	0	0.034	0.086	15.2781
At2g32660	1	3	14.36	4.2766	0.0276	0	0.019	0.1297	18.1095
At2g32660	2	1	2.01	4.2055	-0.0284	0	0.0202	0.1313	18.2851
At2g32660	2	11	48.91	15.4223	-0.061	0	0.0779	0.1449	17.1047
At2g32660	4	1	0.01	4.6487	0.0295	0	0.0194	0.1285	18.2915
At2g32640	2	1	0.01	4.6071	-0.0152	0	0.0207	0.0609	27.2062
At2g32640	4	14	60.91	9.0129	-0.0222	0	0.041	0.0609	27.2137
At2g32800	1	1	2.01	4.6483	-0.0158	0	0.0208	0.1436	40.361
At2g32800	2	10	42.44	14.6957	-0.0288	0	0.062	0.1402	40.2419
At2g32800	2	11	50.91	5.4789	-0.0191	0	0.0253	0.1036	44.5749
At2g32800	3	16	71.38	14.3603	0.028	0	0.0662	0.1524	32.3078
At2g32780	4	15	65.15	3.9879	0.0353	0	0.0171	0.106	1.3495
At2g32780	5	4	16.85	9.092	0.064	0	0.0456	0.0931	1.4365
At2g32780	5	15	77.51	10.3101	-0.0594	0	0.0501	0.1124	1.4157
At2g32780	5	18	91.76	4.1858	-0.04	0	0.0201	0.0824	1.2506
At2g32770	2	2	5.53	5.4114	0.0419	0	0.0237	0.0869	4.4369
At2g32770	2	9	39.45	12.4601	-0.0715	0	0.0621	0.0998	4.0675
At2g32770	2	12	53.87	9.7026	-0.0679	0	0.0538	0.0916	3.814
At2g32770	4	17	76.59	6.2619	-0.0456	0	0.0289	0.0882	4.5624
At2g32650	1	13	56.6	9.431	0.0172	0	0.0413	0.0961	45.3936
At2g32650	2	10	42.44	9.6988	-0.0184	0	0.0417	0.1155	50.0095
At2g32650	2	12	53.87	8.8178	-0.0197	0	0.0452	0.119	53.944
At2g32650	3	11	46.27	4.3271	0.0115	0	0.0183	0.1154	49.9001
At2g32650	4	4	14.7	6.4539	0.0146	0	0.0268	0.1422	40.5954
At2g32650	4	11	46.15	7.0317	0.0147	0	0.029	0.1444	64.2113
At2g32790	1	2	7.05	6.833	-0.0517	0	0.0317	0.1751	2.1042
At2g32790	1	5	22.24	6.2914	-0.0508	0	0.0276	0.1709	2.4428
At2g32790	1	11	48.63	5.8082	-0.0603	0	0.0271	0.1719	2.7801
At2g32790	1	14	61.51	9.8056	0.0673	0	0.0397	0.1672	2.7035
At2g32790	2	11	50.91	27.4531	0.1126	0	0.1264	0.1803	2.4476
At2g32765	1	6	25.24	8.2488	-0.0267	0	0.0329	0.1749	64.9757
At2g32765	1	17	75.76	4.2565	-0.0198	0	0.0165	0.1915	61.3136
At2g32765	1	22	101.88	11.7039	0.0321	0	0.0485	0.1763	64.7235
At2g32765	3	11	46.27	6.3175	0.0239	0	0.0266	0.1234	53.9596
At2g32765	4	13	55.4	4.6624	-0.0211	0	0.0184	0.175	64.8323
At2g32765	5	12	55.54	4.0904	0.0185	0	0.0158	0.1909	52.1476
At2g32810	1	1	2.01	5.9223	-0.0232	0	0.0269	0.1724	25.6415
At2g32810	2	1	0.01	7.4885	-0.0242	0	0.0302	0.1654	26.2735
At2g32810	2	3	10.59	8.2487	-0.0254	0	0.0332	0.1684	24.7465
At2g32810	2	7	28.43	5.2712	0.0231	0	0.0205	0.1889	13.9365
At2g32810	3	9	40.87	4.8728	-0.0205	0	0.0208	0.1705	24.0746
At2g32810	3	15	64.5	12.194	0.0345	0	0.051	0.1428	28.1573
At2g32810	3	17	76.48	18.3097	0.04	0	0.0783	0.1702	24.9233
At2g32810	4	2	5.14	8.6779	0.0288	0	0.0349	0.1683	24.7404
At2g32810	4	7	30.68	4.3026	-0.0202	0	0.0185	0.1869	25.382
At2g32810	5	14	70.7	4.2414	-0.0193	0	0.0188	0.1872	22.5835
At2g32700	2	1	0.01	4.093	-0.0128	0	0.0169	0.1345	176.222
At2g32700	2	3	10.59	5.467	-0.0148	0	0.0226	0.1401	172.183
At2g32700	2	10	42.44	4.3333	-0.0146	0	0.0181	0.1283	169.847
At2g32700	2	12	55.87	7.2244	-0.0193	0	0.0324	0.1427	173.706
At2g32700	4	6	24.04	4.7407	-0.0136	0	0.0191	0.1592	188.043
At2g32700	5	15	73.51	6.2699	-0.0161	0	0.0272	0.0991	284.68
At2g32700	5	18	87.76	4.3404	0.0157	0	0.0179	0.1357	176.164
At2g45570	1	15	66.45	4.6933	0.0278	0	0.0187	0.1664	2.2762
At2g45570	2	10	44.44	7.5355	-0.0416	0	0.0364	0.1507	2.0862
At2g45570	2	13	58.77	13.1683	-0.053	0	0.0595	0.1738	2.1679
At2g45570	3	2	6.2	7.1639	0.0363	0	0.0316	0.1525	3.4121
At2g45570	3	5	18.19	11.2025	0.0434	0	0.0455	0.1664	2.2774
At2g45570	3	6	24.4	5.5918	0.0328	0	0.0259	0.1468	2.575
At2g45570	5	6	27.51	6.0514	-0.0395	0	0.0264	0.1636	2.4429
At2g45570	5	9	42.19	11.6194	0.0536	0	0.0474	0.1664	2.2804
At2g45580	1	17	77.76	4.0753	0.0296	0	0.0192	0.0575	19.5444
At2g45580	2	1	4.01	9.7727	0.0488	0	0.052	0.0683	17.7504
At2g45580	2	4	17.29	9.2114	0.0456	0	0.0452	0.0615	19.5651
At2g45590	2	10	44.44	16.8976	-0.0246	0	0.0827	0.1155	317.377
At2g45590	2	13	58.77	6.0262	-0.0158	0	0.0279	0.1407	292.41
At2g45590	5	7	30.6	5.2684	0.0135	0	0.0284	0.1278	316.985
At2g45590	5	9	42.19	8.6162	0.0152	0	0.0361	0.1355	290.174
At2g45610	1	6	27.24	5.64	-0.044	0	0.0273	0.1136	2.7878
At2g45610	1	16	70.5	4.8642	-0.0394	0	0.0208	0.1084	2.9086
At2g45610	1	22	101.88	4.6705	-0.0381	0	0.0207	0.1079	2.8151
At2g45610	5	8	33.59	4.9785	0.0381	0	0.0214	0.1085	2.9122
At2g45650	1	2	5.05	4.522	0.0372	0	0.0194	0.1068	2.2711
At2g45650	1	19	89.52	3.9507	0.0361	0	0.0179	0.1247	1.6456
At2g45650	3	7	31.17	8.6334	-0.0548	0	0.042	0.1128	2.1791
At2g45650	3	10	45.59	7.389	-0.0499	0	0.0344	0.1053	3.5739
At2g45650	5	6	23.51	12.9349	-0.0635	0	0.0565	0.1068	2.2702
At2g45490	2	2	5.53	5.2329	0.0269	0	0.0215	0.1445	31.7568
At2g45490	3	3	9.14	4.6358	-0.0256	0	0.0194	0.1271	29.065
At2g45490	3	6	22.4	8.9054	-0.0354	0	0.0369	0.1446	31.7625
At2g45490	5	15	75.51	21.0502	0.0667	0	0.101	0.1603	33.6149
At2g45490	5	19	92.94	8.2455	-0.0387	0	0.0341	0.1445	31.7608
At2g45720	5	10	46.02	4.6847	0.0163	0	0.022	0.022	30.4584
At2g45500	2	1	4.01	16.0143	-0.0354	0	0.0735	0.1422	15.9555
At2g45500	2	5	19.97	5.6138	0.0207	0	0.0232	0.1398	14.9045
At2g45500	3	3	9.14	6.8181	0.0186	0	0.0282	0.1398	14.89
At2g45500	4	5	23.45	4.3618	-0.0154	0	0.0188	0.1411	15.201
At2g45500	5	6	23.51	6.2766	0.0179	0	0.026	0.1398	14.8942
At2g45510	1	1	0.01	11.5652	-0.0306	0	0.0467	0.1711	10.4303
At2g45510	2	1	0.01	5.4121	-0.0205	0	0.0215	0.1711	10.4271
At2g45510	2	14	62	9.5259	-0.0375	0	0.0393	0.1494	10.9855
At2g45510	3	15	64.5	13.528	0.033	0	0.0549	0.1712	10.4188
At2g45540	1	10	41.49	6.3379	-0.0279	0	0.0238	0.2213	6.5
At2g45540	1	14	63.51	14.1195	0.0441	0	0.0602	0.2322	7.1606
At2g45540	2	1	0.01	6.9445	-0.0271	0	0.026	0.2213	6.4947
At2g45540	2	10	42.44	20.6609	-0.0501	0	0.0802	0.2209	6.5241
At2g45540	2	12	55.87	8.3575	-0.0344	0	0.0365	0.1772	9.0178
At2g45540	3	17	74.48	14.7287	0.0395	0	0.0563	0.2214	6.4935
At2g45540	5	3	11.82	5.0013	0.0241	0	0.021	0.2423	5.9522
At2g45540	5	10	48.02	4.1933	-0.022	0	0.0174	0.2387	6.1215
At2g45540	5	15	73.51	6.7046	-0.0263	0	0.0244	0.2457	4.8952
At2g45550	2	6	25.48	4.1462	-0.0375	0	0.0199	0.0859	2.5481
At2g45550	3	3	9.14	3.906	-0.0367	0	0.0168	0.101	3.2915
At2g45550	3	9	36.87	9.1224	0.0603	0	0.0405	0.0842	2.7191
At2g45550	3	12	53.88	5.1159	-0.0461	0	0.023	0.0848	2.7359
At2g45550	4	1	0.01	6.6851	-0.0486	0	0.0295	0.0842	2.7207
At2g45600	2	14	64	8.9292	-0.0232	0	0.0426	0.1218	13.465
At2g45600	4	11	46.15	5.9366	0.0171	0	0.0246	0.1369	14.1653
At2g45600	5	4	14.85	6.5845	0.0182	0	0.028	0.1197	13.4351
At2g45530	2	3	10.59	4.8612	-0.0119	0	0.0228	0.0228	15.1418
At2g45530	2	6	23.48	9.7293	-0.0168	0	0.0451	0.0451	14.0029
At2g45530	2	8	36.43	7.2733	-0.0153	0	0.0361	0.0361	19.3299
At2g45560	1	2	5.05	7.044	-0.0364	0	0.032	0.066	4.9761
At2g45560	3	2	4.2	4.93	-0.0303	0	0.0221	0.0657	4.982
At2g45560	4	1	2.01	4.2168	0.032	0	0.0215	0.0688	4.7462
At2g45520	3	6	22.4	19.1714	-0.0202	0	0.0784	0.1761	38.4313
At2g45520	3	12	51.88	9.7303	0.0149	0	0.0429	0.1812	42.3644
At2g45520	4	14	60.91	5.1392	0.0104	0	0.0208	0.1576	36.009
At2g45520	4	16	72.87	4.0821	0.0108	0	0.019	0.1562	22.2592
At2g45520	5	7	30.6	11.7524	0.0158	0	0.052	0.1878	42.4336
At2g45710	1	17	75.76	4.9781	-0.0143	0	0.0196	0.18	59.9705
At2g45710	2	9	39.45	22.4284	-0.0338	0	0.1023	0.2018	54.8982
At2g45710	2	12	53.87	9.139	-0.0237	0	0.0454	0.1449	61.9945
At2g45710	3	1	0.01	4.8727	-0.0142	0	0.0191	0.1799	59.9876
At2g45710	5	1	0.01	4.1742	-0.0148	0	0.0164	0.18	59.9741
At2g45710	5	5	18.82	15.491	0.0287	0	0.0632	0.181	60.1295
At2g45700	1	5	20.24	7.2361	-0.0249	0	0.0277	0.2072	6.6084
At2g45700	2	3	10.59	11.87	-0.0319	0	0.0459	0.2072	6.6078
At2g45700	2	5	21.97	8.6025	-0.0302	0	0.039	0.2003	5.5653
At2g45700	2	10	42.44	10.7938	-0.0345	0	0.0444	0.1558	12.7765
At2g45700	2	13	56.77	14.4687	-0.0389	0	0.0589	0.1703	8.6599
At2g45700	4	3	13.66	4.1435	0.0253	0	0.0174	0.2246	5.8485
At2g45700	4	7	30.68	8.9107	-0.0294	0	0.0403	0.2154	6.0585
At2g45700	5	1	0.01	6.9575	0.0237	0	0.0257	0.2329	5.1829
At2g45700	5	3	11.82	4.0333	0.0191	0	0.0164	0.2236	6.5362
At2g45700	5	11	51.75	5.8929	-0.0237	0	0.0253	0.2325	7.9547
At2g45700	5	15	73.51	4.3427	-0.0191	0	0.0161	0.2234	7.8253
At2g45700	5	19	92.94	4.4076	-0.02	0	0.0164	0.2236	7.6257
At2g45660	2	10	42.44	11.949	-0.025	0	0.0505	0.134	34.6306
At2g45660	2	12	53.87	9.8025	-0.0253	0	0.0483	0.1318	36.6542
At2g45660	3	17	76.48	4.9469	0.0155	0	0.0216	0.1324	35.26
At2g45660	4	5	19.45	5.1	-0.0155	0	0.0211	0.1378	34.1404
At2g45660	5	1	4.01	7.0248	-0.0195	0	0.0309	0.1361	35.344
At2g45660	5	7	30.6	10.9154	0.0252	0	0.0502	0.1446	36.9101
At2g45640	1	2	7.05	7.918	-0.0194	0	0.0357	0.1722	98.5267
At2g45640	1	5	22.24	11.1915	-0.0237	0	0.0503	0.1868	93.6789
At2g45640	1	13	56.6	7.4472	0.0181	0	0.0295	0.1778	87.8253
At2g45640	3	15	64.5	7.5648	0.0181	0	0.0306	0.162	100.675
At2g45640	3	17	76.48	10.9236	0.022	0	0.046	0.1774	89.321
At2g45640	4	4	16.7	8.95	0.021	0	0.0389	0.1811	89.7984
At2g45640	5	6	25.51	8.647	0.0209	0	0.0409	0.1909	85.4103
At2g45670	2	3	10.59	4.7825	-0.0239	0	0.0224	0.0224	122.829
At2g45670	4	4	14.7	3.8602	0.0222	0	0.0177	0.0402	127.012
At2g45690	5	3	9.82	4.6281	0.0136	0	0.0217	0.0217	97.9692
At2g45620	2	1	0.01	4.3845	-0.0164	0	0.0158	0.2485	43.4657
At2g45620	2	9	41.45	32.8992	-0.0509	0	0.1381	0.2479	43.1346
At2g45620	2	12	53.87	16.153	-0.0392	0	0.0775	0.1872	53.577
At2g45620	3	8	32.93	7.961	-0.0224	0	0.0295	0.2327	42.4355
At2g45620	3	15	64.5	6.0098	0.0201	0	0.0223	0.2287	43.6613
At2g45620	3	17	76.48	7.1338	0.0213	0	0.027	0.2333	42.9092
At2g45620	5	8	39.59	11.7507	0.031	0	0.0545	0.2457	39.8912
At2g45620	5	11	53.75	5.5722	0.0218	0	0.0228	0.2141	46.3904
At2g45620	5	15	73.51	4.9815	-0.0183	0	0.0184	0.2328	42.4331
At2g45620	5	18	87.76	4.2164	0.0193	0	0.0152	0.2479	35.9623
At2g45630	2	7	28.43	6.1577	-0.0182	0	0.0276	0.0686	27.1164
At2g45630	3	1	0.01	3.9046	-0.0123	0	0.0166	0.1109	19.3713
At2g45630	5	16	78.93	4.7474	0.0139	0	0.0206	0.0943	16.3996
At2g45680	5	5	18.82	6.7969	-0.0256	0	0.0318	0.0318	24.4059
At2g30520	2	3	10.59	4.8241	-0.0216	0	0.022	0.0486	63.8858
At2g30520	4	3	9.66	5.5356	0.0248	0	0.0253	0.0487	63.8935
At2g30510	2	6	23.48	5.5433	0.0156	0	0.025	0.0594	16.8418
At2g30510	2	9	37.45	7.6435	0.0187	0	0.0344	0.0687	19.1763
At2g30510	3	15	68.5	8.1352	0.0196	0	0.0394	0.073	18.6126
At2g30500	1	2	5.05	8.4156	-0.0379	0	0.0324	0.2062	6.191
At2g30500	2	2	5.53	4.193	-0.027	0	0.0156	0.2218	7.1947
At2g30500	2	6	23.48	3.9602	-0.0294	0	0.0147	0.221	6.3119
At2g30500	2	10	42.44	23.4921	-0.0687	0	0.0938	0.2063	6.2384
At2g30500	2	12	55.87	12.675	-0.0538	0	0.0553	0.1678	7.197
At2g30500	3	3	9.14	8.6899	-0.0391	0	0.0341	0.1881	5.0286
At2g30500	3	7	27.17	7.4548	-0.0436	0	0.0276	0.2338	6.7903
At2g30500	5	16	78.93	9.1032	-0.0406	0	0.035	0.2062	6.1816
At2g30470	2	10	46.44	118.371	-0.1842	0	0.4535	0.4635	2.1785
At2g30470	2	12	53.87	65.7013	-0.1516	0	0.2994	0.3094	17.4344
At2g30470	3	12	49.88	4.7947	0.0291	0	0.0133	0.4191	3.391
At2g30460	2	8	32.43	6.1118	-0.0137	0	0.0277	0.0575	12.4594
At2g30480	2	9	39.45	9.809	0.0629	0	0.0481	0.1014	4.2582
At2g30480	4	17	74.59	7.5465	0.0504	0	0.033	0.0949	4.0043
At2g30480	5	8	33.59	3.9197	-0.0386	0	0.0169	0.1119	3.2483
At2g30480	5	12	55.54	7.9074	0.0512	0	0.0346	0.095	4.0044
At2g30430	2	1	0.01	4.2176	-0.0389	0	0.0193	0.0456	4.3637
At2g30430	2	7	28.43	8.4475	0.0556	0	0.039	0.0456	4.366
At2g30430	5	18	91.76	3.9615	-0.0382	0	0.019	0.0646	3.9315
At2g30610	2	3	10.59	5.4809	-0.0452	0	0.0222	0.1561	5.1143
At2g30610	2	8	32.43	11.5699	-0.0474	0	0.0465	0.1762	4.5752
At2g30610	2	9	39.45	7.2444	-0.0398	0	0.0324	0.1621	3.8731
At2g30610	3	2	6.2	3.9744	-0.0268	0	0.0165	0.1929	3.7693
At2g30610	3	12	53.88	12.9262	0.049	0	0.0539	0.1783	4.4673
At2g30610	3	15	66.5	7.7857	0.0393	0	0.0352	0.1597	4.5007
At2g30610	4	11	48.15	6.0188	0.0342	0	0.0258	0.1817	4.4637
At2g30600	2	2	9.53	6.8804	-0.0431	0	0.0292	0.1717	2.8515
At2g30600	2	5	21.97	11.1443	-0.0539	0	0.053	0.1375	3.8112
At2g30600	2	8	32.43	5.9574	-0.0396	0	0.0238	0.1697	2.9929
At2g30600	3	2	6.2	5.212	-0.0357	0	0.0233	0.1731	3.272
At2g30600	3	12	53.88	14.0164	0.0585	0	0.0605	0.175	3.0386
At2g30600	3	15	68.5	10.5057	0.0507	0	0.0456	0.1601	2.6172
At2g30600	4	11	46.15	5.6564	0.0358	0	0.0226	0.1698	2.9908
At2g30560	1	1	0.01	4.1048	-0.0273	0	0.0178	0.0942	12.4397
At2g30560	1	3	10.36	8.2868	-0.0385	0	0.0357	0.1121	12.7053
At2g30560	1	15	70.45	3.8868	-0.031	0	0.0163	0.1284	11.1521
At2g30560	1	19	85.52	7.7272	0.0369	0	0.0331	0.1122	12.6685
At2g30560	2	3	14.59	4.9113	-0.0299	0	0.0219	0.1135	12.6625
At2g30560	3	6	22.4	5.9972	-0.0322	0	0.0256	0.1122	12.6712
At2g30570	1	1	4.01	6.8743	-0.0109	0	0.0332	0.0916	33.4235
At2g30570	2	1	0.01	6.1216	-0.0098	0	0.0269	0.0879	32.8081
At2g30570	3	13	58.54	7.2079	0.0111	0	0.0342	0.0904	33.1353
At2g30620	1	20	90.37	4.9191	-0.0107	0	0.0215	0.0867	65.1902
At2g30620	2	3	14.59	9.957	-0.016	0	0.0476	0.0906	64.3997
At2g30620	2	6	27.48	7.5598	-0.0138	0	0.0354	0.0784	65.9709
At2g30620	4	8	35.6	4.2922	0.0102	0	0.0196	0.0809	72.7751
At2g30620	4	11	46.15	5.8078	0.0118	0	0.0255	0.0868	65.1975
At2g30400	1	3	10.36	4.5046	-0.0392	0	0.0203	0.063	14.1893
At2g30400	1	22	99.88	6.4524	0.0474	0	0.0298	0.064	14.0753
At2g30400	4	17	76.59	5.1151	0.0426	0	0.024	0.0645	14.1415
At2g30410	3	15	66.5	8.7246	0.0164	0	0.0441	0.0441	42.9898
At2g30420	2	9	41.45	9.6169	-0.0272	0	0.0487	0.0487	30.7266
At2g30550	1	4	19.26	10.8625	-0.0385	0	0.0444	0.2534	5.9859
At2g30550	1	6	27.24	7.1764	-0.0333	0	0.0317	0.2407	4.2146
At2g30550	1	11	50.63	5.9017	0.0278	0	0.0233	0.2486	5.3477
At2g30550	2	10	42.44	39.029	-0.0725	0	0.1537	0.2465	5.8511
At2g30550	3	6	22.4	7.2404	-0.0282	0	0.0263	0.2463	5.7971
At2g30550	5	9	42.19	4.4836	0.0225	0	0.0168	0.2475	5.4943
At2g30540	4	15	65.15	8.8912	-0.0505	0	0.0413	0.0413	29.099
At2g30580	1	4	17.26	6.3133	0.0154	0	0.0322	0.0881	11.4817
At2g30580	4	16	70.87	4.3635	-0.012	0	0.0197	0.059	16.0698
At2g30580	5	12	65.54	4.0263	0.0119	0	0.0193	0.0832	11.4509
At2g30530	3	13	58.54	5.3894	0.0136	0	0.0259	0.0983	29.4818
At2g30530	5	6	27.51	5.7161	0.0135	0	0.0268	0.0969	27.7535
At2g30530	5	19	94.94	10.3586	0.0192	0	0.0493	0.102	27.614
At2g30590	1	2	7.05	9.8559	-0.0272	0	0.046	0.1781	7.3241
At2g30590	2	3	10.59	6.3848	-0.0203	0	0.0257	0.1632	7.6818
At2g30590	2	6	23.48	7.6849	-0.0222	0	0.0308	0.1684	7.5172
At2g30590	3	14	61.81	15.4277	0.0411	0	0.0739	0.1557	8.0999
At2g30590	4	1	2.01	5.3944	0.0214	0	0.0242	0.1926	5.1747
At2g30590	5	13	66.48	4.1287	-0.0165	0	0.0164	0.1684	7.5177
At2g30490	1	3	14.36	5.6775	0.0151	0	0.021	0.2767	320.433
At2g30490	2	8	32.43	8.9456	-0.0207	0	0.0326	0.2474	434.87
At2g30490	2	10	44.44	57.7558	-0.0558	0	0.2512	0.3016	197.971
At2g30490	4	4	14.7	4.1578	0.013	0	0.0142	0.2873	268.122
At2g30490	4	15	65.15	12.1607	-0.022	0	0.0431	0.2731	308.36
At2g30490	4	17	76.59	5.9893	-0.0158	0	0.0229	0.2528	265.698
At2g30490	5	1	0.01	4.1656	-0.0126	0	0.0145	0.2731	308.368
At2g30490	5	10	46.02	4.2965	0.0126	0	0.0147	0.2878	267.558
At2g30390	2	1	0.01	5.582	-0.012	0	0.024	0.1057	32.6991
At2g30390	2	3	10.59	12.1434	-0.0174	0	0.0514	0.1331	27.5106
At2g30390	2	5	21.97	5.403	-0.0127	0	0.0273	0.109	39.0155
At2g30390	3	1	4.01	8.9192	-0.0206	0	0.0379	0.1336	27.6212
At2g30390	3	4	14.28	4.3226	0.0141	0	0.018	0.1332	27.5842
At2g30390	3	17	76.48	7.7499	0.0142	0	0.0336	0.1369	27.7819
At2g02850	5	9	42.19	5.3742	0.0309	0	0.0251	0.0251	21.9904
At2g02850	5	12	55.54	6.9736	0.035	0	0.0325	0.0325	19.9554
At2g02750	1	3	14.36	6.8385	0.0383	0	0.0318	0.0935	12.2165
At2g02750	2	2	5.53	6.2857	0.0353	0	0.0275	0.091	11.9298
At2g02750	3	1	0.01	8.8748	0.0423	0	0.0391	0.0911	11.9373
At2g02750	4	10	42.32	3.9131	0.0281	0	0.0168	0.1077	10.636
At2g02750	5	2	8.75	14.647	0.0643	0	0.0647	0.1557	8.4985
At2g02740	1	5	24.24	8.9666	-0.0279	0	0.044	0.1298	7.879
At2g02740	1	9	37.83	4.2905	0.0181	0	0.018	0.1214	8.9212
At2g02740	3	3	11.14	5.6838	-0.0182	0	0.0272	0.1263	9.3883
At2g02740	3	12	49.88	11.4083	0.0245	0	0.0488	0.1214	8.9185
At2g02740	4	17	74.59	8.5365	0.0212	0	0.0361	0.1254	9.6674
At2g02730	1	9	37.83	8.3671	0.0238	0	0.0345	0.1476	51.9435
At2g02730	2	1	4.01	23.7681	0.0422	0	0.1075	0.1765	51.1819
At2g02730	5	16	78.93	5.2978	0.0191	0	0.0212	0.1661	50.1433
At2g02720	1	22	101.88	3.9933	0.0344	0	0.0167	0.1634	1.8264
At2g02720	2	11	46.91	4.0015	-0.0368	0	0.0163	0.1467	2.2518
At2g02720	4	2	5.14	7.3733	0.0507	0	0.0303	0.1467	2.2509
At2g02720	5	1	0.01	7.9205	-0.0482	0	0.0326	0.1467	2.251
At2g02720	5	12	59.54	9.011	-0.0628	0	0.0506	0.1643	2.7466
At2g02720	5	18	87.76	12.4379	0.0641	0	0.0518	0.1467	2.2506
At2g02710	1	1	2.01	6.6034	-0.0243	0	0.0301	0.1486	10.198
At2g02710	1	18	79.79	4.8159	-0.0197	0	0.0197	0.1449	9.4999
At2g02710	2	3	10.59	11.5089	-0.0321	0	0.048	0.145	9.4977
At2g02710	2	5	21.97	4.0414	-0.0222	0	0.0202	0.1172	10.4602
At2g02710	2	10	42.44	4.5683	-0.0212	0	0.0187	0.1448	9.4871
At2g02710	4	11	48.15	3.8781	0.0189	0	0.0177	0.1626	7.1346
At2g02700	1	2	5.05	4.7106	-0.0429	0	0.0197	0.1326	1.0684
At2g02700	1	6	29.24	10.6484	0.0684	0	0.0484	0.1365	1.034
At2g02700	2	4	15.29	6.7672	-0.0469	0	0.0283	0.1328	1.6385
At2g02700	2	6	27.48	6.7282	-0.0474	0	0.0292	0.1338	1.0327
At2g02700	4	16	70.87	5.2469	0.0419	0	0.0224	0.1116	2.107
At2g02690	1	21	94.93	5.2056	-0.0468	0	0.0275	0.0483	2.2774
At2g02690	5	3	9.82	6.1093	0.0478	0	0.0281	0.0428	2.4599
At2g02830	1	11	50.63	3.8534	0.0364	0	0.0179	0.0777	2.2979
At2g02830	2	2	5.53	3.9372	0.0368	0	0.0177	0.0598	2.2188
At2g02830	2	8	34.43	5.0949	-0.0458	0	0.0256	0.0589	3.4673
At2g02830	2	10	44.44	6.0775	-0.0515	0	0.0302	0.0636	2.0501
At2g02830	3	2	4.2	4.1956	-0.0374	0	0.0189	0.0597	2.2194
At2g02780	1	1	2.01	10.4734	-0.0355	0	0.0489	0.1141	25.9194
At2g02780	2	3	10.59	5.583	-0.0259	0	0.0239	0.1089	25.3293
At2g02780	2	10	42.44	4.3664	-0.0243	0	0.0187	0.1089	25.3487
At2g02770	1	12	51.31	4.8159	-0.0208	0	0.0226	0.0226	90.7185
At2g02810	2	10	42.44	18.6733	-0.0263	0	0.0853	0.0853	42.1184
At2g02810	2	12	55.87	9.6413	-0.0201	0	0.0477	0.0477	75.449
At2g02760	1	4	15.26	4.9173	-0.0134	0	0.0191	0.1878	93.3704
At2g02760	2	9	41.45	16.8366	-0.027	0	0.0715	0.1918	97.9014
At2g02760	2	11	48.91	6.8219	-0.0187	0	0.032	0.1524	150.931
At2g02760	3	17	76.48	8.9313	0.0183	0	0.0361	0.1847	94.5913
At2g02760	4	3	13.66	13.6567	0.0301	0	0.0593	0.1855	97.4212
At2g02760	4	7	30.68	9.6551	-0.0254	0	0.0458	0.2001	99.3822
At2g02760	5	10	46.02	4.0859	0.0121	0	0.0156	0.2034	76.3887
At2g02820	2	4	15.29	5.0575	-0.0387	0	0.0225	0.0741	5.2902
At2g02820	2	12	53.87	8.0698	0.0564	0	0.0407	0.0824	4.9855
At2g02820	5	10	46.02	5.0981	0.0384	0	0.0226	0.0741	5.29
At2g02800	3	13	54.54	7.9465	0.0152	0	0.0361	0.0593	146.437
At2g02800	4	7	28.68	4.396	-0.0111	0	0.0198	0.0593	146.446
At2g19110	2	8	36.43	7.8321	-0.0373	0	0.0389	0.0676	14.6783
At2g19110	2	11	46.91	4.4667	-0.0287	0	0.0203	0.049	15.6124
At2g19110	4	17	76.59	7.8945	-0.0357	0	0.0366	0.0635	14.9591
At2g19120	1	1	0.01	6.8534	-0.0307	0	0.0272	0.1749	8.8353
At2g19120	2	3	10.59	13.44	-0.0492	0	0.0543	0.1749	8.8429
At2g19120	2	7	28.43	9.7767	0.0485	0	0.0391	0.1749	8.8357
At2g19120	2	10	42.44	15.4256	-0.0594	0	0.0627	0.1745	8.8406
At2g19120	3	17	76.48	4.4633	0.0247	0	0.0178	0.1927	8.0771
At2g19120	5	3	11.82	5.7307	0.0303	0	0.0266	0.1812	9.3452
At2g19120	5	15	73.51	3.9518	-0.0233	0	0.0154	0.1903	9.0567
At2g19130	1	16	70.5	4.5361	0.0178	0	0.0169	0.2243	32.8751
At2g19130	2	8	32.43	7.609	-0.0254	0	0.0291	0.2073	46.8028
At2g19130	2	10	44.44	6.0188	-0.0326	0	0.031	0.1964	53.7229
At2g19130	2	13	56.77	10.9235	-0.0327	0	0.0421	0.2074	46.7551
At2g19130	3	10	41.59	4.3793	-0.0179	0	0.0163	0.2238	36.4798
At2g19130	3	17	76.48	5.8692	0.0207	0	0.0229	0.2075	47.3894
At2g19130	5	8	39.59	9.342	0.0294	0	0.046	0.2215	40.787
At2g19130	5	18	87.76	8.7067	0.0256	0	0.0334	0.2075	46.6499
At2g19140	1	6	25.24	8.1344	-0.0439	0	0.0338	0.1428	4.6796
At2g19140	1	8	36.23	5.148	-0.0359	0	0.0229	0.1319	5.6661
At2g19140	3	5	22.19	7.3447	-0.0416	0	0.0308	0.1433	4.7251
At2g19140	4	4	14.7	11.7412	-0.0644	0	0.0494	0.1432	4.6747
At2g19140	4	15	69.15	5.9883	0.0404	0	0.0273	0.1701	4.6828
At2g19140	5	2	4.75	3.9317	0.0305	0	0.0162	0.1362	5.142
At2g19140	5	4	14.85	5.492	0.0368	0	0.0227	0.1427	4.6739
At2g19150	1	4	15.26	3.9968	0.034	0	0.0161	0.1583	2.8606
At2g19150	3	3	11.14	7.6475	0.0496	0	0.0344	0.1435	3.3532
At2g19150	3	6	24.4	8.5914	0.0529	0	0.0395	0.1486	3.5662
At2g19150	4	9	41.79	5.8046	0.0506	0	0.0252	0.1321	3.34
At2g19150	4	13	55.4	9.8757	-0.0667	0	0.0428	0.1069	4.3148
At2g19150	5	3	9.82	6.5761	0.0443	0	0.0272	0.1422	3.4028
At2g19170	1	1	0.01	6.1421	-0.023	0	0.0278	0.0586	27.7448
At2g19170	2	1	0.01	5.5503	-0.0217	0	0.0252	0.0547	24.7108
At2g19170	2	3	12.59	7.3167	-0.0268	0	0.0382	0.0676	29.3147
At2g19010	1	1	2.01	12.5102	-0.0634	0	0.0561	0.1446	4.2894
At2g19010	4	7	28.68	7.3215	0.0526	0	0.0306	0.1366	4.8304
At2g19010	4	14	60.91	8.7762	-0.0563	0	0.0367	0.1364	4.8367
At2g19010	5	12	63.54	4.7366	-0.0409	0	0.0231	0.1595	5.2991
At2g19190	1	4	19.26	4.167	0.0252	0	0.0179	0.1881	4.6396
At2g19190	2	1	0.01	11.4317	-0.0404	0	0.046	0.1741	4.6415
At2g19190	2	3	10.59	10.4456	-0.0387	0	0.0421	0.1702	4.0091
At2g19190	2	4	19.29	6.9102	-0.0341	0	0.0313	0.1594	2.7098
At2g19190	2	13	56.77	6.4723	-0.0333	0	0.027	0.1324	4.0232
At2g19190	5	5	18.82	6.2154	-0.03	0	0.0259	0.1359	4.8602
At2g19190	5	9	42.19	4.1963	0.026	0	0.0164	0.1866	3.4571
At2g19190	5	13	66.48	4.9937	0.0268	0	0.0194	0.1897	3.0894
At2g19190	5	19	96.94	3.8737	0.0248	0	0.0163	0.1866	3.4834
At2g19200	1	21	94.93	4.0946	0.0372	0	0.0192	0.1437	1.3234
At2g19200	2	3	10.59	7.7146	-0.0536	0	0.0336	0.0976	2.634
At2g19200	2	6	23.48	9.2767	-0.0537	0	0.0403	0.1029	2.3817
At2g19200	3	1	0.01	5.088	-0.0388	0	0.0209	0.1454	2.1494
At2g19200	3	16	73.38	7.2407	0.0586	0	0.0351	0.1141	3.1546
At2g19200	5	4	14.85	9.7621	-0.0553	0	0.0416	0.1243	2.7048
At2g19200	5	8	35.59	3.8584	0.0415	0	0.0195	0.1441	2.1536
At2g19060	1	14	63.51	9.9204	0.0585	0	0.0466	0.1647	3.7542
At2g19060	2	8	32.43	10.0338	-0.0618	0	0.0417	0.1567	3.4979
At2g19060	2	12	51.87	6.5848	0.054	0	0.0268	0.1557	3.5305
At2g19060	4	1	2.01	3.9578	-0.0401	0	0.0186	0.1744	2.6091
At2g19060	5	2	4.75	5.3845	0.0404	0	0.0218	0.1558	3.532
At2g19060	5	13	66.48	12.9518	-0.0638	0	0.0535	0.1557	3.5249
At2g19070	2	11	50.91	4.2648	-0.0468	0	0.0217	0.0217	7.4495
At2g19210	1	6	25.24	4.0222	0.0292	0	0.0173	0.0995	2.8287
At2g19210	3	14	59.81	9.4962	-0.0453	0	0.0415	0.0996	2.8173
At2g19210	4	12	50.61	5.5532	-0.0349	0	0.0241	0.0996	2.8158
At2g19210	5	5	20.82	5.8974	0.0362	0	0.0274	0.1023	2.7107
At2g19080	1	12	51.31	4.2155	0.0114	0	0.0178	0.116	8.7086
At2g19080	2	5	19.97	7.7116	-0.0159	0	0.0347	0.0695	14.2268
At2g19080	2	7	30.43	5.6275	-0.0145	0	0.0286	0.0634	17.5183
At2g19080	2	9	41.45	5.5381	-0.0165	0	0.0251	0.1133	7.1962
At2g19080	3	17	76.48	4.2626	0.0118	0	0.0192	0.1136	8.9381
At2g19000	3	1	0.01	5.9474	0.0386	0	0.0275	0.0449	2.0407
At2g19000	3	3	13.14	4.944	0.0368	0	0.025	0.0423	0.926
At2g19000	5	8	37.59	4.3921	0.0366	0	0.0246	0.049	1.7138
At2g19000	5	11	49.75	4.4043	0.0329	0	0.0201	0.0445	2.0369
At2g19180	2	8	32.43	11.276	-0.0203	0	0.049	0.108	12.2245
At2g19180	3	16	69.38	4.7796	0.0131	0	0.0204	0.1082	12.1919
At2g19180	4	3	13.66	10.4404	0.0208	0	0.0479	0.1109	12.5851
At2g33680	2	14	64	4.7434	-0.0361	0	0.0237	0.0621	22.556
At2g33680	3	1	2.01	4.1487	-0.0318	0	0.0199	0.06	21.5119
At2g33680	4	15	65.15	4.4473	-0.0326	0	0.0201	0.0582	21.9306
At2g33840	1	1	0.01	9.9847	-0.0315	0	0.0449	0.0738	20.38
At2g33840	2	3	10.59	6.033	-0.0241	0	0.0269	0.0738	20.3787
At2g33840	4	2	9.14	3.9103	0.0214	0	0.0181	0.0919	15.8545
At2g33700	2	4	15.29	5.8964	-0.0128	0	0.0247	0.1296	103.557
At2g33700	2	6	27.48	10.6185	-0.0178	0	0.0476	0.1525	81.8579
At2g33700	2	9	41.45	4.4345	-0.012	0	0.0194	0.1243	74.6549
At2g33700	3	3	11.14	4.9123	0.0126	0	0.0224	0.1329	98.0316
At2g33700	3	6	22.4	9.0164	0.0172	0	0.0372	0.1478	81.21
At2g33700	3	9	40.87	17.1845	-0.03	0	0.0774	0.1492	83.9921
At2g33700	3	13	54.54	9.4888	0.0204	0	0.0392	0.1477	81.2421
At2g33700	4	5	23.45	6.2819	0.0133	0	0.0262	0.1484	82.1422
At2g33720	5	2	4.75	4.5094	0.0375	0	0.0211	0.0211	5.6059
At2g33710	1	16	70.5	7.7662	0.0511	0	0.0335	0.1056	19.9591
At2g33710	3	10	41.59	3.9147	-0.0421	0	0.0169	0.0999	26.0686
At2g33710	3	15	64.5	11.7514	0.0755	0	0.0524	0.0868	19.3176
At2g33710	3	16	71.38	7.5576	0.0591	0	0.0371	0.0716	21.7166
At2g33860	2	10	42.44	25.5593	-0.0493	0	0.1143	0.1143	65.2851
At2g33860	2	12	55.87	11.0144	-0.0348	0	0.0545	0.0545	168.376
At2g33880	3	3	11.14	5.0871	-0.0384	0	0.0253	0.0767	12.6827
At2g33880	4	14	64.91	10.838	-0.0688	0	0.0497	0.0729	13.9704
At2g33730	1	1	0.01	8.0408	-0.0326	0	0.0318	0.1814	10.6461
At2g33730	1	15	68.45	7.711	0.0327	0	0.0329	0.1866	10.1418
At2g33730	2	10	42.44	18.5425	-0.0532	0	0.0771	0.1633	9.5493
At2g33730	2	12	55.87	8.0794	-0.038	0	0.038	0.1242	9.6037
At2g33730	3	17	76.48	6.4892	0.0294	0	0.0267	0.1839	10.2719
At2g33730	4	2	7.14	4.9731	0.0293	0	0.0217	0.2031	10.8832
At2g33730	4	14	60.91	4.4392	0.0249	0	0.0171	0.1984	9.3022
At2g33730	5	4	14.85	4.3796	0.0235	0	0.0169	0.1982	10.6514
At2g33760	2	1	0.01	5.2324	-0.0207	0	0.024	0.0459	295.194
At2g33760	5	12	55.54	6.0355	-0.0223	0	0.0277	0.0459	295.129
At2g33770	1	6	29.24	4.055	-0.0207	0	0.0157	0.2311	23.7014
At2g33770	1	10	43.49	7.871	-0.032	0	0.0318	0.2471	18.7443
At2g33770	1	14	61.51	5.365	0.0229	0	0.0202	0.2153	28.5816
At2g33770	2	9	41.45	24.0744	-0.0532	0	0.0992	0.2199	31.216
At2g33770	2	12	55.87	13.6796	-0.042	0	0.0588	0.1794	29.942
At2g33770	3	10	43.59	5.5579	-0.0253	0	0.0235	0.2388	23.3958
At2g33770	3	13	56.54	5.1358	-0.0269	0	0.0219	0.2373	24.5874
At2g33770	3	17	76.48	4.8203	0.0226	0	0.0197	0.2122	27.5245
At2g33770	4	1	0.01	4.0831	-0.0211	0	0.015	0.2304	26.264
At2g33770	5	5	18.82	7.8581	0.028	0	0.0298	0.2153	28.5976
At2g33770	5	15	73.51	18.6316	-0.044	0	0.0725	0.2153	28.6042
At2g33790	1	12	55.31	4.4177	0.0386	0	0.0191	0.1606	3.2183
At2g33790	2	1	2.01	4.3004	0.0415	0	0.0206	0.1454	4.0654
At2g33790	2	8	36.43	17.1718	-0.092	0	0.0795	0.1603	4.044
At2g33790	2	13	56.77	7.1492	0.0568	0	0.0296	0.1415	4.0655
At2g33790	3	1	2.01	8.5049	-0.0542	0	0.0377	0.1447	3.6927
At2g33790	4	4	18.7	4.0053	-0.0376	0	0.0171	0.1423	4.0663
At2g33670	3	3	13.14	19.63	-0.084	0	0.0945	0.1112	3.2841
At2g33670	5	5	18.82	4.7817	-0.0394	0	0.0206	0.1014	3.6239
At2g33850	1	10	41.49	7.056	-0.0368	0	0.031	0.0903	11.2807
At2g33850	2	10	42.44	13.4497	-0.0545	0	0.0601	0.0904	11.2927
At2g33850	2	12	51.87	9.4093	-0.0473	0	0.0423	0.0726	12.3907
At2g33810	1	4	19.26	4.4624	-0.0195	0	0.0199	0.1607	6.1377
At2g33810	1	16	74.5	7.9251	0.0258	0	0.0356	0.1633	6.9348
At2g33810	2	10	42.44	19.0864	-0.0408	0	0.0798	0.1572	6.3855
At2g33810	2	12	55.87	5.3542	-0.0232	0	0.0247	0.1021	6.4408
At2g33810	3	9	38.87	6.8474	0.0242	0	0.0314	0.1588	5.1144
At2g33810	3	12	51.88	7.5106	0.0253	0	0.0341	0.1615	5.7193
At2g33830	1	2	7.05	5.5587	-0.0341	0	0.0306	0.0306	9.0045
At2g33830	3	14	61.81	4.1596	0.0285	0	0.021	0.0445	8.4067
At2g33735	1	4	15.26	4.7321	0.0137	0	0.0208	0.082	27.5584
At2g33735	3	7	27.17	3.914	-0.0124	0	0.017	0.0915	27.8198
At2g33735	3	9	38.87	6.1384	-0.0166	0	0.0295	0.104	28.6748
At2g33735	3	17	74.48	6.2557	0.0157	0	0.0271	0.0998	28.3056
At2g33735	5	5	18.82	5.3668	0.0145	0	0.0232	0.0998	28.3273
At2g33845	2	9	39.45	7.2046	-0.0143	0	0.0373	0.0598	9.6543
At2g33845	4	10	42.32	5.5142	0.0114	0	0.025	0.0551	9.3331
At2g33800	1	10	41.49	3.9977	-0.008	0	0.017	0.1148	101.205
At2g33800	1	18	81.79	5.8888	0.0103	0	0.027	0.1182	104.096
At2g33800	2	5	19.97	4.438	0.0085	0	0.0188	0.1147	101.156
At2g33800	2	13	56.77	6.5444	-0.0118	0	0.0278	0.1176	111.842
At2g33800	2	15	68.77	5.4313	-0.0102	0	0.0257	0.1156	105.096
At2g33800	4	3	9.66	8.4498	0.0126	0	0.0362	0.1147	101.15
At2g33980	1	13	60.6	9.0655	0.0526	0	0.0367	0.1948	1.8927
At2g33980	1	19	89.52	3.8812	0.0355	0	0.016	0.176	2.3489
At2g33980	1	22	99.88	8.5282	0.0507	0	0.0336	0.1937	1.954
At2g33980	2	11	48.91	12.8854	0.0701	0	0.0568	0.204	2.0218
At2g33980	2	13	58.77	5.4965	0.0471	0	0.0263	0.1735	3.621
At2g33980	5	5	22.82	13.923	-0.0882	0	0.059	0.1961	2.0735
At2g33980	5	8	35.59	7.8436	0.066	0	0.0367	0.201	1.6828
At2g33740	1	2	5.05	4.6687	-0.0142	0	0.0205	0.1013	41.8185
At2g33740	1	4	15.26	5.1234	-0.0148	0	0.0221	0.1029	44.1535
At2g33740	2	5	21.97	5.617	-0.0165	0	0.0274	0.0883	45.2562
At2g33740	2	8	32.43	9.5899	-0.0204	0	0.0417	0.1026	44.2511
At2g33740	4	15	65.15	4.0706	-0.0135	0	0.0175	0.1028	44.1584
At2g33740	5	3	13.82	4.2544	0.0141	0	0.0199	0.1051	43.7313
At2g33740	5	6	27.51	4.4806	0.0141	0	0.0201	0.1054	40.5143
At2g34880	1	6	29.24	9.4193	0.0667	0	0.0435	0.1296	0.3051
At2g34880	1	10	43.49	14.2137	-0.0856	0	0.0769	0.1501	0.3192
At2g34880	2	3	12.59	5.3959	0.0398	0	0.0246	0.1299	0.2768
At2g34880	3	1	0.01	6.2087	-0.041	0	0.0261	0.1263	0.288
At2g34880	4	1	2.01	4.3239	0.0381	0	0.0197	0.1285	0.2727
At2g34910	2	1	0.01	10.1211	0.0587	0	0.0468	0.0468	3.6491
At2g34920	1	19	85.52	4.3552	0.0297	0	0.0198	0.0512	20.6214
At2g34920	5	2	6.75	6.9491	0.0393	0	0.0339	0.0729	21.4321
At2g34930	2	14	64	5.4845	-0.0321	0	0.0278	0.0278	23.4321
At2g34940	1	7	33.84	4.3441	0.0201	0	0.017	0.2103	34.0851
At2g34940	1	11	46.63	10.952	-0.032	0	0.0421	0.2103	33.4996
At2g34940	2	10	44.44	26.8587	-0.0433	0	0.1146	0.2205	35.1476
At2g34940	3	16	71.38	4.7892	0.0165	0	0.0191	0.2294	29.588
At2g34940	5	14	68.7	6.128	0.0191	0	0.0239	0.188	32.6394
At2g34940	5	17	83.45	12.0026	0.0315	0	0.0462	0.2103	33.5107
At2g34960	2	10	42.44	10.0653	0.0606	0	0.0439	0.1111	4.4328
At2g34960	2	11	48.91	9.6488	0.0734	0	0.0513	0.1185	4.5383
At2g34960	2	13	60.77	7.4818	-0.0554	0	0.0357	0.1154	4.7512
At2g34960	3	1	0.01	3.9378	-0.032	0	0.0164	0.1269	4.0346
At2g34960	3	11	46.27	4.9997	-0.0386	0	0.0217	0.0933	4.5446
At2g34960	3	13	58.54	8.1183	-0.0595	0	0.0376	0.1092	4.3327
At2g34960	3	17	74.48	15.2587	0.0801	0	0.0667	0.1104	4.4219
At2g34960	5	9	42.19	4.6844	0.0343	0	0.0196	0.13	4.2222
At2g34790	1	19	85.52	9.4871	0.0562	0	0.0373	0.1882	5.964
At2g34790	2	11	50.91	29.3201	-0.1144	0	0.1299	0.1999	5.8896
At2g34790	3	16	69.38	4.5278	-0.0387	0	0.0176	0.1882	5.9657
At2g34790	5	19	92.94	8.7567	-0.0557	0	0.0344	0.1882	5.9653
At2g34970	2	10	42.44	8.816	-0.0287	0	0.0391	0.0915	6.2501
At2g34970	3	17	74.48	6.8149	0.0236	0	0.0298	0.0911	6.2654
At2g34970	4	3	9.66	4.404	0.0204	0	0.0192	0.0911	6.2732
At2g34980	4	14	62.91	4.4946	0.0297	0	0.0235	0.0235	50.1014
At2g34990	2	5	19.97	11.6751	-0.0574	0	0.0489	0.1413	4.4413
At2g34990	3	3	9.14	7.4689	0.0462	0	0.031	0.1412	4.4439
At2g34990	3	14	59.81	5.1737	-0.0384	0	0.0213	0.1412	4.4426
At2g34990	4	6	24.04	7.9134	-0.0476	0	0.0328	0.1412	4.441
At2g34990	5	13	66.48	6.4535	0.043	0	0.0267	0.1412	4.4421
At2g35000	1	12	55.31	4.3412	0.0305	0	0.0194	0.2245	10.4417
At2g35000	2	5	21.97	30.9251	-0.0808	0	0.1378	0.2025	12.9371
At2g35000	2	8	34.43	6.3199	-0.0396	0	0.0277	0.2029	12.6794
At2g35000	3	5	22.19	11.319	0.0561	0	0.0446	0.2046	12.2591
At2g35000	3	9	36.87	6.2404	-0.0416	0	0.0239	0.2051	12.2466
At2g35000	3	15	64.5	8.086	0.0408	0	0.0311	0.2051	10.9782
At2g35000	3	17	76.48	7.4482	0.0378	0	0.0294	0.2035	12.3608
At2g35010	5	5	18.82	4.1788	0.0096	0	0.0194	0.0429	22.2242
At2g35010	5	14	70.7	6.7285	-0.013	0	0.0353	0.0483	23.5623
At2g35030	2	12	51.87	6.4644	-0.0455	0	0.028	0.1005	17.4788
At2g35030	3	16	69.38	8.0046	0.0463	0	0.0348	0.1005	17.471
At2g35030	4	3	9.66	3.9324	0.0346	0	0.0166	0.1171	18.5231
At2g35030	5	7	32.6	7.5063	-0.0559	0	0.0352	0.1018	17.6146
At2g35030	5	10	46.02	3.9997	0.04	0	0.0172	0.1005	17.4818
At2g35030	5	18	89.76	3.8658	0.0347	0	0.0185	0.119	14.0548
At2g35040	1	3	10.36	9.3852	-0.0217	0	0.0368	0.1966	86.0186
At2g35040	1	5	22.24	6.2864	-0.0193	0	0.0287	0.1885	74.5856
At2g35040	2	1	0.01	3.9618	-0.0139	0	0.0152	0.1965	85.8303
At2g35040	2	10	42.44	22.1425	-0.0359	0	0.0892	0.1966	86.2017
At2g35040	3	6	22.4	4.5419	-0.015	0	0.0175	0.1965	85.8027
At2g35040	3	15	64.5	8.7498	0.0212	0	0.034	0.1964	85.8382
At2g35040	3	17	76.48	5.5259	0.0167	0	0.0223	0.1847	85.1871
At2g35050	2	1	0.01	8.878	-0.0312	0	0.0323	0.2481	8.867
At2g35050	2	7	28.43	5.577	0.03	0	0.0208	0.2238	10.6668
At2g35050	2	9	41.45	38.3608	-0.0725	0	0.1709	0.2196	18.2289
At2g35050	2	12	55.87	6.4249	-0.0321	0	0.0277	0.1798	13.0595
At2g35050	3	17	76.48	4.4322	0.0212	0	0.0165	0.2647	9.1422
At2g35050	4	12	50.61	3.9895	0.0201	0	0.0141	0.2622	7.5633
At2g35050	5	3	11.82	4.7362	0.0231	0	0.0192	0.2674	8.0117
At2g35050	5	15	73.51	7.6485	-0.0278	0	0.0279	0.2484	8.8221
At2g35060	2	10	42.44	44.7037	-0.0576	0	0.1713	0.2744	328.509
At2g35060	2	12	53.87	26.1768	-0.0502	0	0.1217	0.2248	412.988
At2g35060	3	16	73.38	6.7057	0.0205	0	0.0243	0.2766	328.973
At2g35060	4	5	19.45	3.9567	0.0159	0	0.014	0.259	295.702
At2g35060	5	5	18.82	9.2003	0.0238	0	0.0323	0.2751	326.477
At2g34800	1	7	33.84	7.4447	-0.0678	0	0.0335	0.1071	3.6977
At2g34800	1	11	46.63	10.0911	0.0607	0	0.0454	0.0736	2.9212
At2g34800	1	12	53.31	5.0211	0.0541	0	0.0255	0.0538	3.4441
At2g34800	1	20	90.37	4.9817	-0.0413	0	0.0207	0.1331	3.2617
At2g34800	3	4	16.28	4.3477	-0.0396	0	0.0194	0.1354	3.4374
At2g34810	1	8	34.23	6.3852	0.0272	0	0.0279	0.0906	4.5366
At2g34810	1	20	90.37	4.7105	0.0227	0	0.019	0.156	4.6906
At2g34810	2	10	42.44	4.1381	-0.0224	0	0.0168	0.1537	5.2629
At2g34810	3	13	54.54	9.1659	0.0324	0	0.0383	0.1369	4.7464
At2g34810	5	11	49.75	4.5303	0.0233	0	0.0183	0.1552	5.0327
At2g34810	5	16	78.93	5.4119	-0.0248	0	0.0224	0.1369	4.7488
At2g34820	1	1	0.01	7.2492	0.0483	0	0.0314	0.101	12.4508
At2g34820	1	7	29.84	4.1386	-0.0367	0	0.0178	0.1009	12.4577
At2g34820	4	14	62.91	14.4176	-0.0833	0	0.0723	0.1114	13.5133
At2g34820	4	17	76.59	7.7007	0.0552	0	0.0344	0.1015	12.3168
At2g34830	3	16	69.38	6.2616	-0.0454	0	0.0266	0.1159	1.9942
At2g34830	4	3	9.66	4.643	0.042	0	0.0197	0.1159	1.9945
At2g34830	5	7	28.6	4.4306	0.0384	0	0.0188	0.1159	1.9937
At2g34830	5	16	82.93	11.3031	-0.0642	0	0.0503	0.1177	1.921
At2g34830	5	19	96.94	7.0191	-0.0519	0	0.0327	0.1002	2.7694
At2g34840	2	12	53.87	185.078	-0.2421	0	0.6389	0.6389	7.362
At2g34850	1	4	19.26	5.5418	-0.0263	0	0.0273	0.0509	9.8284
At2g34850	3	14	59.81	5.7319	0.0258	0	0.0262	0.0482	9.9639
At2g34870	1	9	37.83	9.8009	-0.0536	0	0.04	0.1585	2.0103
At2g34870	1	19	85.52	3.8812	0.0338	0	0.0153	0.1738	1.6183
At2g34870	2	2	5.53	4.8663	-0.0386	0	0.0196	0.1584	2.01
At2g34870	2	5	19.97	4.7984	0.0485	0	0.0189	0.1774	1.6756
At2g34870	2	10	42.44	4.1286	-0.0376	0	0.0166	0.1584	2.005
At2g34870	3	1	0.01	12.0627	0.0602	0	0.0496	0.1586	2.0096
At2g34870	3	3	11.14	7.939	0.0514	0	0.0364	0.1454	1.7618
At2g34870	5	19	94.94	6.3431	0.0475	0	0.0291	0.1653	1.6344
At2g35020	2	10	42.44	20.4067	-0.0289	0	0.0881	0.1365	328.201
At2g35020	2	12	55.87	22.4427	-0.0313	0	0.1	0.1484	462.462
At2g35020	2	14	62	7.4936	-0.0195	0	0.0299	0.1706	300.424
At2g35020	3	4	16.28	5.9355	0.0149	0	0.0238	0.2133	331.034
At2g35020	3	10	41.59	6.4036	-0.0148	0	0.025	0.1895	316.883
At2g35020	3	15	68.5	8.6491	0.0192	0	0.0404	0.2026	256.423
At2g35020	5	10	46.02	3.9085	0.0113	0	0.0149	0.2044	272.26
At2g26350	4	2	9.14	9.7542	0.0209	0	0.0483	0.0521	35.3272
At2g26350	4	7	28.68	5.0054	-0.0135	0	0.0229	0.0479	36.2893
At2g26260	3	6	24.4	6.58	-0.0171	0	0.0333	0.0504	8.2242
At2g26260	4	9	39.79	4.2201	-0.0136	0	0.021	0.0483	8.2818
At2g26240	1	1	4.01	17.8089	-0.0301	0	0.0743	0.2024	59.7062
At2g26240	2	10	42.44	25.3512	-0.0375	0	0.1026	0.1968	58.1118
At2g26240	2	12	55.87	7.9057	-0.0232	0	0.0377	0.1319	55.2515
At2g26240	3	14	59.81	9.9176	0.0264	0	0.0368	0.2342	49.836
At2g26240	5	8	33.59	5.5519	0.0162	0	0.0214	0.1973	58.0337
At2g26210	1	9	37.83	4.9313	-0.0128	0	0.0202	0.1444	43.2364
At2g26210	1	12	53.31	3.9342	0.0146	0	0.0184	0.1629	51.5462
At2g26210	2	1	0.01	14.5791	-0.0225	0	0.0628	0.1229	42.7816
At2g26210	3	17	76.48	6.8647	0.0155	0	0.0293	0.1436	43.5396
At2g26210	4	1	0.01	6.2312	0.0153	0	0.0256	0.1444	43.2345
At2g26180	1	16	72.5	4.2978	-0.016	0	0.0201	0.1453	26.7147
At2g26180	2	7	28.43	5.2633	0.0203	0	0.0221	0.1253	28.9823
At2g26180	2	10	42.44	12.5014	-0.0336	0	0.054	0.1261	29.2359
At2g26180	3	5	18.19	5.9158	-0.0178	0	0.0249	0.1252	28.9821
At2g26180	5	3	13.82	3.9673	0.015	0	0.0176	0.1189	36.6328
At2g26180	5	6	25.51	6.3853	0.0201	0	0.0316	0.1328	29.5675
At2g26180	5	16	78.93	9.0353	-0.0227	0	0.0383	0.1253	28.9896
At2g26320	1	14	61.51	12.0213	0.0611	0	0.0517	0.1176	1.6819
At2g26320	1	20	90.37	9.7691	-0.0549	0	0.0418	0.1177	1.6817
At2g26320	3	7	27.17	4.967	-0.0378	0	0.021	0.1176	1.6822
At2g26320	5	12	55.54	5.4191	-0.0396	0	0.0229	0.1195	1.424
At2g26320	5	15	73.51	4.9622	-0.0379	0	0.021	0.1176	1.6789
At2g26290	2	1	2.01	8.7353	-0.051	0	0.04	0.151	5.4344
At2g26290	2	4	15.29	12.8903	-0.0589	0	0.0527	0.1637	3.3717
At2g26290	3	2	4.2	5.6829	0.0385	0	0.0228	0.1637	3.3672
At2g26290	5	9	44.19	19.9828	0.0771	0	0.0909	0.1789	3.4187
At2g26290	5	12	59.54	13.048	0.0647	0	0.0642	0.1522	2.8722
At2g26280	3	10	43.59	4.0492	-0.0206	0	0.022	0.0703	89.7873
At2g26280	3	16	73.38	10.4546	0.0302	0	0.0514	0.0514	109.143
At2g26230	2	10	42.44	5.9788	-0.0101	0	0.0262	0.0976	20.2675
At2g26230	3	13	54.54	7.6316	0.0107	0	0.0332	0.0973	20.2316
At2g26230	3	15	68.5	5.0222	0.0089	0	0.023	0.0871	18.6631
At2g26230	4	17	76.59	6.4289	0.01	0	0.0288	0.0957	20.5373
At2g26300	2	1	2.01	4.3421	-0.0129	0	0.0215	0.0862	8.9715
At2g26300	2	14	62	7.76	-0.0171	0	0.0343	0.0833	8.3983
At2g26300	3	1	0.01	6.5219	-0.0149	0	0.0288	0.0834	8.3958
At2g26330	1	1	0.01	7.509	-0.0293	0	0.0295	0.1845	10.3942
At2g26330	2	3	12.59	7.664	-0.0327	0	0.0335	0.1902	10.8828
At2g26330	2	10	42.44	14.7168	-0.0483	0	0.0592	0.1845	10.4294
At2g26330	2	15	66.77	6.5227	0.0298	0	0.0256	0.1845	10.3985
At2g26330	3	16	73.38	5.4801	0.0255	0	0.0229	0.1868	10.1798
At2g26250	1	15	70.45	5.8854	0.0216	0	0.0242	0.1483	50.0251
At2g26250	2	9	41.45	11.1201	-0.0329	0	0.051	0.1546	46.0383
At2g26250	3	17	76.48	4.6314	0.0194	0	0.0193	0.1486	50.1778
At2g26250	4	3	13.66	8.0566	0.0338	0	0.036	0.1474	51.0769
At2g26250	4	7	28.68	12.1797	-0.0397	0	0.0507	0.1483	49.9724
At2g26200	1	2	5.05	3.9721	-0.0126	0	0.0157	0.1717	12.8989
At2g26200	1	22	101.88	6.2568	-0.0163	0	0.0265	0.1545	15.9168
At2g26200	2	1	0.01	5.2574	-0.0145	0	0.0208	0.1767	14.6173
At2g26200	2	3	10.59	5.0339	-0.0148	0	0.0199	0.1759	11.4052
At2g26200	2	10	42.44	13.559	-0.0266	0	0.056	0.1556	15.4335
At2g26200	2	12	55.87	9.0228	-0.0276	0	0.041	0.1405	21.6905
At2g26200	2	15	66.77	7.3976	0.0191	0	0.0301	0.1559	15.4067
At2g26200	3	5	18.19	4.7062	0.0138	0	0.0186	0.1746	11.6912
At2g26200	3	14	63.81	4.6242	0.014	0	0.0191	0.175	12.873
At2g26200	4	1	0.01	10.3565	0.0221	0	0.0425	0.156	15.4002
At2g26200	4	2	7.14	5.5576	0.0178	0	0.0258	0.1393	16.3934
At2g26200	4	7	30.68	3.9074	-0.014	0	0.0184	0.1744	13.9046
At2g26200	4	13	59.4	4.5858	-0.0147	0	0.0197	0.1757	10.7695
At2g26200	5	3	9.82	6.4477	0.0165	0	0.0262	0.156	15.4013
At2g26340	1	1	0.01	12.4574	-0.019	0	0.0541	0.1111	87.8544
At2g26340	3	10	41.59	6.9369	-0.0152	0	0.0297	0.111	87.8096
At2g26340	3	15	64.5	10.622	0.019	0	0.0459	0.111	87.849
At2g26340	3	16	71.38	6.7657	0.0147	0	0.031	0.0962	75.7439
At2g26170	1	3	10.36	5.3485	-0.0152	0	0.0208	0.1901	67.0202
At2g26170	1	9	37.83	4.9292	0.0138	0	0.0196	0.1692	68.1761
At2g26170	1	17	79.76	6.2758	-0.0213	0	0.0243	0.1936	51.8759
At2g26170	1	22	101.88	4.8114	-0.0141	0	0.0204	0.1412	84.7068
At2g26170	2	4	15.29	6.3853	-0.0165	0	0.0255	0.1693	68.2213
At2g26170	2	11	48.91	16.8943	-0.031	0	0.078	0.1874	72.1055
At2g26170	2	13	60.77	10.8685	-0.0231	0	0.0482	0.1575	71.0015
At2g26190	2	8	32.43	9.9904	-0.0268	0	0.0417	0.1452	24.8213
At2g26190	3	17	76.48	13.2861	0.0313	0	0.0578	0.1423	24.6958
At2g26190	5	14	68.7	6.4929	-0.0216	0	0.0273	0.127	38.5887
At2g44300	1	1	0.01	6.1341	0.0153	0	0.0258	0.1264	8.5519
At2g44300	2	9	41.45	8.6763	-0.0196	0	0.039	0.1292	9.0362
At2g44300	3	6	22.4	6.7396	-0.0159	0	0.0283	0.1264	8.5534
At2g44300	4	7	28.68	8.5287	-0.0179	0	0.036	0.1263	8.5575
At2g44360	1	4	19.26	10.7439	-0.0212	0	0.0483	0.1469	44.7672
At2g44360	1	7	29.84	7.7525	-0.0176	0	0.0339	0.1326	44.2424
At2g44360	2	7	28.43	4.3178	0.0154	0	0.0181	0.124	47.7468
At2g44360	2	10	42.44	13.368	-0.0289	0	0.0569	0.143	44.9572
At2g44360	3	15	64.5	6.471	0.0156	0	0.0267	0.1417	45.0448
At2g44370	2	3	14.59	9.3832	-0.043	0	0.0471	0.0668	21.3666
At2g44370	4	7	28.68	4.1654	0.027	0	0.0187	0.0616	24.0026
At2g44380	2	4	17.29	14.8725	-0.0526	0	0.0638	0.2627	14.1267
At2g44380	2	12	51.87	6.0922	-0.035	0	0.0245	0.1647	61.0802
At2g44380	2	14	64	22.5896	-0.0656	0	0.0966	0.2368	23.7656
At2g44380	3	17	74.48	5.6215	0.0283	0	0.0197	0.2702	14.9564
At2g44380	4	17	76.59	10.7428	0.0414	0	0.041	0.2504	13.8083
At2g44380	5	15	77.51	5.8815	0.0317	0	0.0242	0.2536	13.8121
At2g44430	1	21	92.93	4.1309	-0.0355	0	0.0181	0.0837	1.969
At2g44430	2	10	46.44	4.8811	0.0427	0	0.0226	0.0853	1.9318
At2g44430	3	17	76.48	3.9534	-0.0352	0	0.0182	0.102	1.6127
At2g44430	4	2	5.14	4.2544	-0.0403	0	0.0187	0.0837	1.9683
At2g44430	5	5	18.82	8.3144	0.0522	0	0.0369	0.0836	1.9633
At2g44430	5	7	32.6	3.8636	0.0364	0	0.0188	0.0656	1.6347
At2g44440	2	3	10.59	8.4834	-0.0267	0	0.0359	0.1265	41.9539
At2g44440	2	5	21.97	3.9356	-0.0191	0	0.0182	0.1089	35.8402
At2g44440	3	15	64.5	6.1472	0.0229	0	0.0258	0.1264	42.0541
At2g44440	4	3	9.66	8.7136	0.0295	0	0.0379	0.0996	42.3429
At2g44440	4	7	28.68	4.203	-0.0212	0	0.0178	0.1174	43.3862
At2g44450	2	10	42.44	8.1247	-0.0275	0	0.0323	0.1763	29.1541
At2g44450	2	12	53.87	4.05	-0.0217	0	0.0192	0.1632	40.6524
At2g44450	3	1	2.01	5.8797	0.0257	0	0.0254	0.2018	27.7489
At2g44450	3	6	22.4	5.0457	-0.0212	0	0.0199	0.1764	29.0606
At2g44450	3	12	49.88	13.1335	0.0344	0	0.0529	0.1765	29.0318
At2g44450	5	7	30.6	7.8746	0.0275	0	0.0327	0.1783	29.0524
At2g44450	5	12	55.54	5.2279	0.0217	0	0.0206	0.1764	29.0846
At2g44460	1	19	85.52	4.5307	0.0385	0	0.019	0.1267	1.3022
At2g44460	2	3	10.59	4.0756	0.0365	0	0.017	0.1268	1.3045
At2g44460	4	1	2.01	8.2306	-0.061	0	0.0398	0.1344	1.3961
At2g44460	4	11	46.15	5.2078	0.0479	0	0.0219	0.1268	1.3018
At2g44460	4	15	65.15	13.1376	-0.0784	0	0.0561	0.1268	1.3025
At2g44460	4	16	72.87	6.6701	-0.0521	0	0.0304	0.1011	1.8142
At2g44470	3	7	31.17	4.7121	-0.05	0	0.0247	0.0456	4.7734
At2g44470	5	9	44.19	4.6434	0.0427	0	0.0243	0.0244	5.8782
At2g44480	2	10	42.44	5.5505	-0.0479	0	0.0241	0.0958	4.8382
At2g44480	2	12	53.87	5.6148	-0.0637	0	0.0304	0.1025	6.1728
At2g44480	3	17	74.48	5.4831	0.0431	0	0.0223	0.1532	3.6173
At2g44480	4	2	5.14	6.3658	0.0516	0	0.026	0.1532	3.6199
At2g44480	5	1	0.01	8.4648	-0.0546	0	0.0347	0.1532	3.6184
At2g44480	5	12	59.54	4.6231	0.0438	0	0.0227	0.176	2.9082
At2g44480	5	15	75.51	5.4323	0.0451	0	0.0234	0.1766	2.918
At2g44490	2	3	10.59	4.9371	-0.0101	0	0.0224	0.0547	101.383
At2g44490	3	13	56.54	7.1718	0.0133	0	0.0379	0.0614	105.602
At2g44500	1	1	0.01	4.6047	-0.0226	0	0.0196	0.1137	5.4605
At2g44500	3	15	64.5	15.956	0.0426	0	0.0696	0.1136	5.4617
At2g44500	4	1	2.01	7.5048	0.0333	0	0.0371	0.1224	5.0255
At2g44250	1	7	29.84	3.906	0.0378	0	0.0165	0.1292	2.9673
At2g44250	1	22	101.88	4.374	0.0414	0	0.0208	0.0614	3.6717
At2g44250	2	14	64	5.0491	-0.0457	0	0.0233	0.1156	2.8521
At2g44250	4	16	70.87	4.1564	-0.0383	0	0.0177	0.1127	3.0933
At2g44270	1	14	61.51	5.0193	0.0134	0	0.0212	0.1202	30.7462
At2g44270	3	10	41.59	4.1957	-0.0126	0	0.0177	0.1202	30.7488
At2g44270	3	16	71.38	19.3166	0.0287	0	0.0918	0.1372	26.996
At2g44270	5	10	46.02	5.3829	0.0139	0	0.0227	0.1202	30.7512
At1g76170	1	15	66.45	6.9098	-0.0198	0	0.0302	0.0936	22.2951
At1g76170	2	8	34.43	5.5007	-0.0187	0	0.0265	0.0994	22.1519
At1g76170	3	16	73.38	4.4702	0.0163	0	0.0203	0.0946	22.5112
At1g76170	4	3	11.66	5.6658	0.0201	0	0.0274	0.0974	23.1881
At2g44560	1	22	101.88	7.3187	0.0493	0	0.0348	0.0348	3.5343
At2g44195	2	3	12.59	5.5578	-0.0408	0	0.0281	0.0514	10.7282
At2g44195	3	2	4.2	5.0506	0.0371	0	0.0231	0.0476	10.506
At2g44530	3	14	63.81	4.8578	0.015	0	0.0241	0.0241	440.88
At2g44530	3	17	74.48	5.015	0.0146	0	0.0235	0.0235	413.437
At2g44310	2	9	41.45	11.5175	-0.0208	0	0.0562	0.099	26.9756
At2g44310	3	15	64.5	5.1166	0.0125	0	0.0223	0.0916	26.3973
At2g44310	5	4	16.85	4.4935	0.0122	0	0.0214	0.0936	26.0664
At2g44210	1	17	75.76	6.6726	0.0152	0	0.0292	0.0916	71.6465
At2g44210	4	1	2.01	7.6671	0.0195	0	0.0378	0.1172	57.5783
At2g44210	4	7	28.68	5.8649	-0.0148	0	0.025	0.1109	57.8201
At2g44210	5	12	55.54	7.7115	0.0162	0	0.0331	0.1109	57.8037
At2g44350	2	3	10.59	5.163	-0.0134	0	0.0215	0.1295	76.6482
At2g44350	3	15	64.5	6.3441	0.0152	0	0.0271	0.1121	96.9843
At2g44350	4	1	4.01	14.8691	0.0257	0	0.0671	0.1335	79.4056
At2g44350	4	4	14.7	15.9271	0.0249	0	0.0681	0.1345	74.3905
At2g44525	1	3	14.36	6.0116	-0.0126	0	0.0265	0.1624	18.8319
At2g44525	2	10	42.44	13.4907	-0.0193	0	0.0557	0.1587	18.5983
At2g44525	3	17	76.48	8.7931	0.0149	0	0.0378	0.1629	17.8088
At2g44525	5	9	42.19	13.2611	0.0181	0	0.0551	0.1595	18.4314
At2g44525	5	11	51.75	4.2319	0.0108	0	0.0196	0.1241	16.3488
At2g44510	4	12	50.61	4.7947	0.0195	0	0.0225	0.0225	12.5205
At2g44510	4	16	72.87	3.9392	-0.019	0	0.0194	0.042	12.7959
At2g44200	1	1	0.01	5.3458	-0.0296	0	0.0232	0.0949	3.478
At2g44200	2	10	42.44	9.5536	-0.0422	0	0.0424	0.0956	3.509
At2g44200	5	4	14.85	6.3374	0.0324	0	0.0279	0.0952	3.49
At2g44520	1	1	0.01	4.1356	0.0121	0	0.0178	0.1022	42.1368
At2g44520	2	9	37.45	9.3693	-0.0187	0	0.0408	0.1022	42.1457
At2g44520	3	3	13.14	4.4188	0.013	0	0.0204	0.1044	41.9443
At2g44520	4	7	32.68	3.8807	-0.0119	0	0.0174	0.1196	41.0308
At2g44520	5	3	13.82	8.623	0.0181	0	0.0392	0.104	42.5775
At2g44520	5	6	25.51	7.4011	0.017	0	0.0355	0.1003	44.0076
At2g44260	1	1	0.01	3.9347	0.0368	0	0.0149	0.2096	8.7399
At2g44260	1	4	15.26	7.5204	-0.044	0	0.0292	0.1947	6.7828
At2g44260	2	2	5.53	17.1589	-0.068	0	0.0709	0.1639	4.3264
At2g44260	2	4	17.29	11.1091	-0.0671	0	0.0518	0.1566	4.1643
At2g44260	4	5	23.45	4.2038	-0.0334	0	0.0167	0.1953	6.7628
At2g44260	4	14	64.91	5.2447	0.0385	0	0.0203	0.215	5.1084
At2g44260	5	8	35.59	12.0353	0.0595	0	0.0536	0.1854	2.2637
At2g44260	5	11	51.75	16.8978	0.0711	0	0.0764	0.2083	7.7049
At2g44230	2	14	62	6.9544	-0.0295	0	0.0318	0.0514	7.4009
At2g44230	4	7	28.68	5.3909	-0.0246	0	0.0246	0.0515	7.404
At2g44240	1	22	101.88	5.0381	-0.0379	0	0.0196	0.2178	3.5122
At2g44240	2	3	10.59	11.454	0.0609	0	0.0447	0.1985	4.5033
At2g44240	2	5	21.97	9.7438	0.0653	0	0.0422	0.196	4.4732
At2g44240	2	9	39.45	34.384	-0.134	0	0.1601	0.2185	4.0688
At2g44240	2	14	66	8.1743	0.0535	0	0.0335	0.2008	4.5616
At2g44240	5	2	4.75	6.8275	0.0441	0	0.0264	0.1982	4.5368
At2g44240	5	10	46.02	8.1343	0.0484	0	0.0315	0.1981	4.5355
At2g39940	2	9	37.45	10.3827	-0.018	0	0.0392	0.2219	475.565
At2g39940	4	5	19.45	7.5678	0.0162	0	0.0317	0.1318	620.908
At2g39940	4	8	33.6	8.3383	-0.0213	0	0.0336	0.1654	423.674
At2g39940	5	5	20.82	12.834	0.0265	0	0.056	0.2255	457.742
At2g39940	5	8	33.59	4.6407	-0.0146	0	0.018	0.2178	451.561
At2g39950	2	9	41.45	39.5365	-0.066	0	0.1806	0.2101	117.194
At2g39950	3	17	76.48	5.4595	0.0213	0	0.0207	0.2291	91.2579
At2g39950	4	7	28.68	5.2936	-0.0207	0	0.0196	0.228	120.212
At2g39950	5	8	41.59	8.4583	0.0286	0	0.0353	0.2116	118.482
At2g39950	5	15	73.51	6.2599	-0.0238	0	0.0238	0.2083	119.007
At2g40010	2	10	42.44	15.2302	-0.0237	0	0.0661	0.132	5.3832
At2g40010	3	12	51.88	8.7167	0.0177	0	0.0407	0.1378	6.0222
At2g40010	3	15	68.5	6.9407	0.0155	0	0.0315	0.1285	7.5718
At2g40010	4	8	33.6	8.816	0.0168	0	0.0372	0.1301	5.468
At2g40030	2	2	5.53	8.8669	-0.0484	0	0.0382	0.1106	7.2508
At2g40030	2	13	60.77	14.1163	0.0685	0	0.0667	0.1171	8.3098
At2g40030	4	1	0.01	4.3343	0.0359	0	0.0185	0.1106	7.2416
At2g40030	5	10	46.02	4.2968	-0.0333	0	0.0183	0.1106	7.2467
At2g40040	1	3	12.36	7.6182	-0.0325	0	0.0371	0.108	41.9921
At2g40040	1	7	33.84	4.253	-0.0233	0	0.0191	0.0899	43.2118
At2g40040	2	6	23.48	3.9577	-0.0216	0	0.0167	0.1194	39.4784
At2g40040	3	9	36.87	9.2899	-0.0354	0	0.0404	0.1027	38.9747
At2g40040	3	11	48.27	6.7442	-0.0359	0	0.0344	0.0967	36.1191
At2g40040	3	15	64.5	7.294	0.0317	0	0.0316	0.1027	38.9752
At2g40040	3	17	76.48	5.3154	0.0265	0	0.025	0.0961	45.0913
At2g40040	4	17	76.59	4.6413	-0.0242	0	0.0208	0.1016	39.3429
At2g40050	4	2	5.14	5.8991	0.0467	0	0.0268	0.0557	1.6691
At2g40050	4	5	19.45	11.8238	0.0699	0	0.0529	0.0818	0.6037
At2g40050	4	9	37.79	10.4678	-0.0659	0	0.0468	0.0819	0.6087
At2g40050	5	18	89.76	6.2324	0.0472	0	0.0311	0.0874	0.5838
At2g40070	1	18	79.79	8.813	0.0312	0	0.0359	0.1574	23.2724
At2g40070	2	8	32.43	9.2007	-0.0321	0	0.0387	0.1364	27.9957
At2g40070	2	10	42.44	14.3913	-0.0419	0	0.0597	0.1573	23.3063
At2g40070	2	12	55.87	6.8682	-0.0314	0	0.0325	0.1301	25.2616
At2g40070	3	6	22.4	4.0458	0.0215	0	0.0163	0.1574	23.2679
At2g40070	3	13	58.54	4.7364	-0.0317	0	0.023	0.155	22.6019
At2g40070	3	17	74.48	16.0445	0.0534	0	0.0666	0.1574	23.2824
At2g39880	2	12	51.87	8.5017	-0.0274	0	0.0346	0.157	40.7844
At2g39880	2	14	64	9.581	-0.029	0	0.0426	0.165	41.5998
At2g39880	3	17	74.48	4.043	0.0174	0	0.0162	0.1605	41.1299
At2g39880	4	9	39.79	6.0615	0.0225	0	0.0269	0.1633	42.5121
At2g39880	5	1	2.01	15.2773	0.035	0	0.0674	0.1688	41.4437
At2g39880	5	14	68.7	8.8314	-0.0255	0	0.036	0.1606	41.1803
At2g39900	2	13	58.77	4.277	-0.0124	0	0.0209	0.1055	8.9146
At2g39900	3	12	49.88	4.0417	-0.0107	0	0.0177	0.0845	8.0462
At2g39900	5	7	30.6	13.1106	0.0216	0	0.0698	0.1038	7.6981
At2g39900	5	15	73.51	5.0481	-0.0122	0	0.0222	0.0847	8.0363
At2g39930	2	9	41.45	8.3378	-0.0237	0	0.0416	0.0616	61.4801
At2g39930	2	13	56.77	4.9648	0.018	0	0.0222	0.0643	57.0108
At2g39930	3	16	73.38	4.0783	0.013	0	0.0197	0.0663	58.6571
At2g40000	2	5	21.97	3.8498	0.0211	0	0.019	0.1187	8.1128
At2g40000	3	3	9.14	5.5708	0.0242	0	0.0241	0.0996	8.2357
At2g40000	3	17	74.48	5.0742	0.0228	0	0.0219	0.0997	8.2394
At2g40000	5	8	33.59	7.2942	0.028	0	0.0328	0.1018	8.1042
At2g40000	5	9	44.19	4.4761	0.0225	0	0.0214	0.0905	8.1503
At2g40000	5	18	87.76	7.6375	0.0286	0	0.0332	0.0997	8.2373
At2g39890	1	1	2.01	6.9127	0.0135	0	0.0315	0.1756	9.14
At2g39890	1	14	63.51	9.4787	0.0165	0	0.0437	0.1529	11.0368
At2g39890	1	19	89.52	6.8272	-0.0141	0	0.031	0.1469	11.9942
At2g39890	1	22	101.88	5.1656	-0.0115	0	0.0224	0.1383	14.9198
At2g39890	4	17	76.59	5.7943	-0.012	0	0.0244	0.1447	11.7212
At2g39890	5	2	4.75	6.7952	-0.014	0	0.028	0.144	11.7203
At2g39890	5	4	14.85	7.1421	0.0177	0	0.0312	0.1141	15.6256
At2g39890	5	7	28.6	14.5498	0.0204	0	0.0611	0.144	11.736
At2g40020	3	17	74.48	12.148	0.0204	0	0.0509	0.1413	38.767
At2g40020	4	4	18.7	10.7739	0.0202	0	0.0475	0.1449	37.7002
At2g40020	4	6	26.04	6.0934	0.0152	0	0.0276	0.125	53.0301
At2g40020	5	2	4.75	10.0452	0.0186	0	0.0419	0.1413	38.7667
At2g40020	5	3	11.82	7.9156	0.0174	0	0.036	0.1354	37.8774
At2g40060	2	9	41.45	6.1745	-0.0127	0	0.0311	0.0311	46.4437
At2g40060	2	12	53.87	7.3343	-0.0147	0	0.039	0.039	40.1079
At2g39920	1	2	7.05	6.4438	-0.0274	0	0.0337	0.0548	9.5302
At2g39920	5	13	68.48	4.5549	0.0219	0	0.0213	0.0512	9.7083
At2g39910	1	10	43.49	4.6484	-0.0129	0	0.0224	0.1168	34.6793
At2g39910	2	11	46.91	16.5944	-0.0252	0	0.0727	0.1121	39.6295
At2g39910	2	12	53.87	8.3524	-0.0192	0	0.0416	0.081	31.2046
At2g39910	3	14	59.81	6.0626	0.014	0	0.0259	0.1122	39.609
At2g39970	1	17	75.76	6.1329	0.013	0	0.0255	0.1367	375.057
At2g39970	2	6	27.48	9.3632	-0.0183	0	0.0447	0.0979	399.196
At2g39970	2	9	39.45	20.0252	-0.0296	0	0.0915	0.1447	394.952
At2g39970	2	13	56.77	6.2461	0.0161	0	0.0259	0.1367	374.994
At2g39970	5	9	44.19	7.3432	0.0156	0	0.0366	0.1454	381.423
At2g39970	5	12	55.54	4.4797	0.0112	0	0.0187	0.1275	396.954
At2g40080	2	10	42.44	9.5192	-0.048	0	0.0419	0.0929	23.7441
At2g40080	2	15	68.77	4.2422	-0.0329	0	0.0194	0.1125	21.5969
At2g40080	5	3	13.82	9.9242	0.0491	0	0.0487	0.0998	22.153
At2g40080	5	6	27.51	4.8486	0.0339	0	0.0233	0.0744	20.7696
At2g40080	5	11	53.75	5.4047	0.0426	0	0.0292	0.1224	17.2069
At2g40080	5	15	73.51	4.56	-0.0315	0	0.0198	0.0932	23.6597
At2g39980	1	12	51.31	3.923	0.0212	0	0.0162	0.1388	16.3847
At2g39980	1	18	79.79	7.5195	-0.0284	0	0.0318	0.1227	19.9502
At2g39980	2	10	42.44	13.7682	-0.0412	0	0.0592	0.1224	20.0742
At2g39980	2	12	53.87	8.6675	-0.036	0	0.0422	0.1053	26.3007
At2g39980	4	2	9.14	8.5004	-0.0337	0	0.0386	0.1257	20.7085
At2g39980	5	6	27.51	4.4669	0.0238	0	0.0221	0.1448	20.2689
At2g39990	2	1	0.01	4.24	-0.0072	0	0.0183	0.0981	13.7907
At2g39990	2	13	56.77	6.9743	-0.0101	0	0.0311	0.0747	18.5555
At2g39990	4	17	76.59	4.8125	0.0077	0	0.0212	0.098	13.8756
At2g39870	2	1	0.01	5.3829	-0.0245	0	0.0215	0.1688	208.778
At2g39870	2	9	39.45	7.6861	-0.034	0	0.0333	0.1724	203.096
At2g39870	2	14	62	4.9991	-0.026	0	0.0199	0.1687	208.711
At2g39870	3	15	64.5	9.0653	0.0318	0	0.0367	0.1643	241.207
At2g39870	3	17	76.48	10.439	0.0344	0	0.0434	0.1709	211.761
At2g39870	4	10	42.32	6.028	0.0258	0	0.0241	0.1687	208.673
At2g34690	1	22	101.88	4.4535	-0.0099	0	0.0203	0.1058	14.0182
At2g34690	2	9	39.45	4.9089	-0.0108	0	0.0226	0.108	12.7791
At2g34690	4	13	55.4	10.3843	-0.0172	0	0.0451	0.1064	13.5302
At2g34690	4	17	74.59	6.2421	0.0126	0	0.0268	0.1063	13.529
At2g34680	1	1	0.01	6.5818	-0.022	0	0.0262	0.1719	9.0962
At2g34680	2	2	9.53	15.8747	-0.0354	0	0.0696	0.1802	8.4165
At2g34680	3	9	36.87	8.7522	-0.0255	0	0.0351	0.1719	9.0901
At2g34680	3	17	74.48	10.9896	0.0285	0	0.0443	0.1719	9.0872
At2g34680	4	2	7.14	6.0037	0.0248	0	0.0284	0.1788	8.5565
At2g34670	1	5	22.24	8.5138	-0.0532	0	0.0409	0.1049	5.0564
At2g34670	3	13	56.54	4.2736	0.0381	0	0.0213	0.0455	6.7807
At2g34670	3	16	71.38	17.5909	0.0755	0	0.0849	0.1091	4.5054
At2g34670	4	1	0.01	3.8537	-0.035	0	0.0163	0.1158	4.3612
At2g34750	2	3	10.59	18.1299	-0.0308	0	0.0731	0.1853	19.0489
At2g34750	2	5	21.97	5.0462	-0.0175	0	0.0235	0.1357	21.1897
At2g34750	3	12	49.88	12.7803	0.0258	0	0.0509	0.1853	19.0307
At2g34750	3	14	63.81	8.2108	0.0213	0	0.0341	0.1685	18.5826
At2g34750	4	3	13.66	5.9934	0.0234	0	0.0256	0.187	19.9514
At2g34750	4	7	28.68	14.3172	-0.0367	0	0.0572	0.1852	19.0539
At2g34750	4	12	54.61	5.9977	0.0215	0	0.0264	0.1891	18.6954
At2g34740	3	6	22.4	6.8437	0.039	0	0.0292	0.1149	4.9303
At2g34740	3	13	54.54	8.7971	-0.0448	0	0.0377	0.1149	4.9328
At2g34740	4	1	0.01	8.2226	-0.0443	0	0.0352	0.1149	4.9304
At2g34740	5	10	46.02	6.3362	0.0368	0	0.027	0.1149	4.9308
At2g34730	1	1	0.01	5.2858	-0.0301	0	0.0223	0.1192	16.719
At2g34730	2	3	12.59	6.5448	-0.035	0	0.0299	0.123	16.8919
At2g34730	2	10	44.44	7.0974	-0.0418	0	0.0349	0.0988	16.8258
At2g34730	2	13	56.77	12.871	-0.0514	0	0.0554	0.1192	16.7269
At2g34730	3	9	38.87	3.9059	-0.0271	0	0.0183	0.1376	14.5767
At2g34720	1	12	51.31	3.9405	0.018	0	0.0161	0.1472	1.5922
At2g34720	2	8	32.43	6.8549	-0.0239	0	0.0287	0.1309	2.2065
At2g34720	3	15	66.5	15.3259	0.0378	0	0.0723	0.1446	2.0354
At2g34720	5	18	87.76	10.2322	0.0297	0	0.0432	0.1311	2.199
At2g34710	2	1	0.01	7.4305	-0.0253	0	0.0312	0.1299	38.7058
At2g34710	2	7	28.43	4.1628	0.0227	0	0.0173	0.1298	38.7179
At2g34710	2	10	42.44	17.9406	-0.0487	0	0.0779	0.1307	39.043
At2g34710	2	12	55.87	13.2514	-0.0418	0	0.0716	0.1243	47.2711
At2g34710	3	17	74.48	5.3826	0.0204	0	0.0225	0.1298	38.7118
At2g34700	1	19	85.52	4.7901	-0.0384	0	0.0201	0.1265	5.1175
At2g34700	1	22	99.88	9.6898	-0.055	0	0.0408	0.1473	3.7545
At2g34700	2	1	2.01	5.1182	-0.0417	0	0.0234	0.1698	4.1931
At2g34700	3	9	40.87	4.9231	0.0391	0	0.0211	0.1475	3.793
At2g34700	4	15	65.15	6.1022	0.0476	0	0.0253	0.1379	4.1665
At2g34700	4	17	76.59	7.6717	0.05	0	0.0325	0.1451	3.751
At2g34700	5	12	59.54	9.1597	0.0591	0	0.0459	0.1576	3.5228
At2g34700	5	19	96.94	8.5858	-0.0553	0	0.0377	0.1457	3.7074
At2g34770	1	2	5.05	7.9849	-0.027	0	0.032	0.171	2.8472
At2g34770	2	3	14.59	10.5362	-0.0316	0	0.0442	0.1731	2.8126
At2g34770	3	14	63.81	13.2248	0.0361	0	0.0569	0.1759	2.8024
At2g34770	4	2	5.14	6.3276	0.0262	0	0.0252	0.1712	2.8382
At2g34770	4	12	50.61	7.1959	0.0262	0	0.0288	0.1712	2.8366
At2g34660	2	9	41.45	17.2358	-0.0564	0	0.0863	0.0863	23.6233
At2g34660	2	12	55.87	3.8711	-0.0279	0	0.0199	0.0199	21.2479
At2g19300	1	11	46.63	4.6629	0.0389	0	0.0213	0.0471	5.3189
At2g19300	4	8	33.6	6.7976	-0.0471	0	0.0312	0.0472	5.3194
At2g19320	1	5	20.24	4.5376	0.0409	0	0.0213	0.0213	1.6623
At2g19330	3	1	4.01	4.957	-0.0408	0	0.0226	0.0599	5.0657
At2g19330	5	9	44.19	5.8004	0.0464	0	0.0292	0.0542	5.2016
At2g19330	5	12	59.54	8.3812	0.0593	0	0.0478	0.0728	5.3699
At2g19340	1	1	2.01	5.5887	-0.0152	0	0.0275	0.0465	16.7248
At2g19340	4	3	9.66	4.561	0.0142	0	0.0209	0.0432	17.1918
At2g19360	5	18	87.76	4.6432	0.0431	0	0.0218	0.0218	4.8191
At2g19370	2	1	0.01	3.977	0.0368	0	0.0169	0.1131	2.5545
At2g19370	2	3	10.59	5.6651	0.0439	0	0.024	0.1202	2.1938
At2g19370	2	15	68.77	4.1278	-0.0404	0	0.0191	0.1222	1.9616
At2g19370	4	4	14.7	8.6325	0.0669	0	0.0374	0.1054	2.6502
At2g19370	5	19	92.94	4.4574	-0.0402	0	0.0188	0.1202	2.1893
At2g19380	1	3	14.36	3.8683	0.0225	0	0.0171	0.1203	18.8707
At2g19380	3	3	13.14	9.8203	0.0372	0	0.0468	0.1086	21.5736
At2g19380	4	13	55.4	7.3334	-0.0338	0	0.0317	0.1033	21.1042
At2g19380	5	4	14.85	3.9053	0.0223	0	0.0166	0.1198	24.3044
At2g19380	5	16	80.93	13.3992	0.0477	0	0.0661	0.1144	20.5689
At2g19380	5	18	89.76	5.3875	0.0331	0	0.0286	0.0768	28.9597
At2g19410	1	15	70.45	4.2978	-0.0351	0	0.0199	0.0383	1.5917
At2g19410	3	12	49.88	4.3149	0.0353	0	0.0199	0.0382	1.5849
At2g19230	1	13	56.6	6.1411	-0.0402	0	0.0258	0.1277	2.24
At2g19230	1	20	90.37	3.965	0.0331	0	0.0171	0.0979	1.5214
At2g19230	1	22	101.88	10.708	0.0545	0	0.0469	0.1276	2.3317
At2g19230	3	2	4.2	3.9279	0.0318	0	0.0165	0.1244	2.7668
At2g19230	3	5	18.19	4.7147	0.035	0	0.0197	0.1277	2.24
At2g19230	4	2	5.14	4.8478	0.0392	0	0.0207	0.1105	2.6196
At2g19250	1	9	39.83	8.3487	0.0629	0	0.0381	0.106	0.2738
At2g19250	1	13	56.6	7.7156	-0.0519	0	0.0347	0.0679	0.444
At2g19250	2	2	5.53	8.0885	-0.051	0	0.0337	0.1371	0.6739
At2g19250	4	16	72.87	6.6532	-0.0488	0	0.0299	0.1408	0.7584
At2g19250	5	2	4.75	4.6965	0.0385	0	0.019	0.1561	0.5225
At2g19250	5	4	14.85	3.854	0.0353	0	0.0159	0.153	0.1917
At2g19270	2	9	39.45	17.3111	-0.0322	0	0.0926	0.1107	77.561
At2g19270	2	13	56.77	5.0471	0.0171	0	0.022	0.0886	62.2841
At2g19270	5	4	16.85	4.1994	0.0127	0	0.0203	0.0898	54.0832
At2g19270	5	7	28.6	4.3936	0.0122	0	0.0192	0.0886	62.2917
At2g19280	1	10	41.49	4.3378	0.0145	0	0.0206	0.0406	9.1703
At2g19280	5	16	78.93	3.96	-0.014	0	0.0182	0.0394	9.4735
At2g19290	3	3	13.14	6.1312	-0.056	0	0.03	0.0642	1.9824
At2g19290	3	10	43.59	8.6498	-0.0676	0	0.0453	0.1153	1.8399
At2g19430	1	3	10.36	6.4167	0.0113	0	0.0278	0.1077	132.954
At2g19430	1	17	79.76	5.95	0.0108	0	0.0255	0.1075	132.614
At2g19430	4	2	5.14	6.9795	0.0127	0	0.03	0.1075	132.648
At2g19430	4	4	18.7	6.7537	0.0118	0	0.0297	0.1072	122.994
At2g19430	5	12	55.54	4.3731	0.0092	0	0.0187	0.1075	132.617
At2g19420	1	21	94.93	5.5715	-0.0515	0	0.0282	0.0782	3.6472
At2g19420	2	10	44.44	6.8119	0.0602	0	0.0335	0.0782	3.5038
At2g19420	3	1	0.01	4.0984	0.0416	0	0.0182	0.0745	3.4799
At2g19440	1	2	5.05	5.9005	-0.0232	0	0.027	0.0496	10.295
At2g19440	1	18	83.79	6.2911	0.0254	0	0.0323	0.054	10.5563
At2g19440	5	7	32.6	3.9655	0.0194	0	0.0189	0.0687	8.0305
At2g19310	1	7	31.84	8.5662	-0.0193	0	0.0384	0.1687	16.521
At2g19310	2	10	42.44	4.7819	-0.0144	0	0.0192	0.1626	16.0618
At2g19310	3	11	48.27	10.2545	0.0213	0	0.0465	0.1706	11.6964
At2g19310	5	4	16.85	9.4111	0.0207	0	0.0442	0.123	13.8805
At2g19310	5	7	28.6	20.1403	0.0284	0	0.0839	0.1627	16.0396
At2g19385	1	3	12.36	6.852	-0.0224	0	0.0336	0.1341	19.5475
At2g19385	2	14	64	6.9186	-0.0238	0	0.035	0.1347	16.571
At2g19385	3	13	54.54	10.0643	0.0254	0	0.0427	0.1263	21.1126
At2g19385	3	15	64.5	7.0718	0.0213	0	0.0302	0.1138	20.0145
At2g19385	4	3	9.66	5.7251	0.0205	0	0.024	0.1263	21.1086
At2g19350	1	2	5.05	23.434	-0.0397	0	0.0969	0.1759	11.8799
At2g19350	1	18	83.79	4.0403	0.0166	0	0.017	0.1776	11.8567
At2g19350	2	10	42.44	5.0946	-0.0196	0	0.0213	0.1269	13.8476
At2g19350	4	1	2.01	5.3475	0.0212	0	0.0242	0.1819	11.1509
At2g19460	1	1	0.01	8.489	-0.0192	0	0.0348	0.1513	11.4312
At2g19460	2	3	14.59	10.4813	-0.0218	0	0.0456	0.1551	11.2669
At2g19460	2	5	21.97	7.6199	-0.0191	0	0.0351	0.1445	10.1409
At2g19460	3	15	64.5	7.8093	0.0184	0	0.032	0.1513	11.4269
At2g19460	4	1	4.01	10.9931	0.0244	0	0.0483	0.1545	11.6103
At2g19450	3	4	14.28	4.5334	0.0142	0	0.0208	0.0412	12.549
At2g19450	4	1	0.01	4.7171	0.0153	0	0.0216	0.0412	12.5503
At2g19390	1	3	12.36	4.5597	-0.0308	0	0.0237	0.0684	32.265
At2g19390	2	6	23.48	7.143	-0.0358	0	0.0326	0.0535	24.6427
At2g19390	2	9	39.45	11.4298	-0.0504	0	0.0603	0.0812	23.4518
At2g23720	1	12	51.31	4.23	0.0366	0	0.0179	0.1144	0.3407
At2g23720	2	1	0.01	5.4506	0.0414	0	0.0232	0.1144	0.3422
At2g23720	4	3	13.66	10.1978	0.064	0	0.0507	0.0915	0.4753
At2g23720	4	7	30.68	4.19	-0.0485	0	0.0209	0.1046	0.0839
At2g23700	2	10	42.44	4.1183	-0.034	0	0.0178	0.0989	6.3167
At2g23700	4	3	9.66	6.5678	0.0431	0	0.0277	0.1241	6.6834
At2g23700	4	12	52.61	6.412	-0.0452	0	0.033	0.1091	7.8211
At2g23700	4	14	62.91	12.7807	-0.0613	0	0.062	0.138	5.8711
At2g23700	4	17	74.59	8.8788	-0.0471	0	0.0381	0.1141	7.0064
At2g23690	2	4	17.29	8.2134	-0.0348	0	0.0434	0.0434	13.1276
At2g23640	2	14	64	4.8187	-0.0409	0	0.0248	0.0248	2.9678
At2g23640	5	12	57.54	3.8532	0.036	0	0.021	0.0424	3.2735
At2g23680	2	2	7.53	4.1574	-0.0234	0	0.0195	0.1171	23.3222
At2g23680	2	9	41.45	15.1538	-0.047	0	0.0747	0.1078	23.9765
At2g23680	2	11	48.91	9.2881	-0.0391	0	0.0481	0.0812	20.2627
At2g23680	3	17	74.48	3.8706	0.0208	0	0.0164	0.114	21.0995
At2g23680	5	5	22.82	10.0382	-0.0482	0	0.05	0.1068	20.96
At2g23680	5	8	35.59	5.5061	0.0357	0	0.0295	0.1056	25.1358
At2g23770	2	1	0.01	5.7965	-0.0315	0	0.0204	0.2675	34.4688
At2g23770	2	3	10.59	11.6785	-0.0458	0	0.0406	0.2877	27.4766
At2g23770	2	9	39.45	28.8396	-0.0804	0	0.1168	0.3068	29.9191
At2g23770	3	11	46.27	5.0414	-0.0302	0	0.0173	0.2827	22.9307
At2g23770	3	13	56.54	7.1275	-0.0437	0	0.0285	0.2939	25.6114
At2g23770	3	17	74.48	12.9641	0.0531	0	0.0451	0.2877	27.4623
At2g23770	4	2	5.14	6.5643	-0.0353	0	0.0225	0.2877	27.4764
At2g23770	5	15	75.51	5.0662	0.0294	0	0.0181	0.3058	26.8176
At2g23750	1	1	0.01	9.3043	-0.0284	0	0.038	0.1578	3.154
At2g23750	1	7	33.84	5.0111	0.0209	0	0.0209	0.1586	3.1564
At2g23750	2	4	17.29	16.7646	-0.0373	0	0.0732	0.1624	3.001
At2g23750	2	10	42.44	5.0534	-0.0222	0	0.02	0.1778	2.7816
At2g23750	3	9	36.87	3.9135	-0.0171	0	0.0155	0.1733	3.6389
At2g23750	5	2	4.75	4.7961	0.0219	0	0.0198	0.137	4.5251
At2g23750	5	4	14.85	4.9632	0.02	0	0.021	0.1381	3.8382
At2g23750	5	13	66.48	4.691	0.0194	0	0.0186	0.1764	3.4739
At2g23750	5	18	87.76	3.9469	0.0175	0	0.0156	0.1734	3.4686
At2g23740	1	1	2.01	4.3529	-0.023	0	0.0201	0.1186	7.3596
At2g23740	2	10	42.44	10.0665	-0.0361	0	0.0444	0.0942	11.8682
At2g23740	3	15	64.5	5.1035	0.0239	0	0.0216	0.1156	7.963
At2g23740	5	11	53.75	4.646	-0.0242	0	0.0225	0.1188	8.0996
At2g23730	5	1	0.01	6.5092	0.0492	0	0.03	0.0444	4.1355
At2g23730	5	7	32.6	6.0845	-0.0502	0	0.0295	0.0738	3.4699
At2g23730	5	12	61.54	7.73	-0.0602	0	0.0431	0.0875	5.0781
At2g23730	5	19	92.94	4.1259	0.0399	0	0.0189	0.0443	4.1393
At2g23810	1	1	0.01	10.7388	-0.0242	0	0.0448	0.1417	20.7561
At2g23810	1	2	7.05	5.8051	-0.0193	0	0.0288	0.1256	22.7659
At2g23810	2	4	15.29	12.6335	-0.0261	0	0.0529	0.1417	20.7584
At2g23810	2	6	25.48	4.8713	-0.0172	0	0.0231	0.1118	23.2567
At2g23810	3	13	54.54	6.5061	0.0188	0	0.0269	0.1417	20.7592
At2g23810	3	15	68.5	6.2323	0.0185	0	0.0266	0.1414	25.5141
At2g23810	4	1	4.01	4.9774	0.0188	0	0.023	0.1452	19.8587
At2g23670	1	3	12.36	3.8497	-0.0158	0	0.0188	0.1582	3.8473
At2g23670	1	18	81.79	3.966	-0.0154	0	0.018	0.1573	3.6281
At2g23670	2	8	32.43	7.821	-0.0207	0	0.0324	0.1424	3.5992
At2g23670	2	10	42.44	7.0706	-0.021	0	0.0295	0.1396	4.0198
At2g23670	3	14	59.81	7.2145	0.02	0	0.0299	0.1393	4.0273
At2g23670	4	1	4.01	6.6372	0.0268	0	0.0329	0.1463	3.8408
At2g23670	4	5	19.45	17.9059	-0.041	0	0.0762	0.1393	4.028
At2g23670	4	7	32.68	6.8413	-0.0258	0	0.0328	0.0959	6.0763
At2g23670	4	11	48.15	8.0748	0.024	0	0.0377	0.1446	3.896
At2g23800	2	3	14.59	5.1145	-0.0441	0	0.0251	0.0718	1.4948
At2g23800	2	8	36.43	9.3719	0.0636	0	0.048	0.077	1.7001
At2g23800	2	11	48.91	5.3761	0.053	0	0.0302	0.0591	1.1159
At2g23800	2	15	68.77	6.1676	-0.0456	0	0.0293	0.0663	1.401
At2g23660	1	12	51.31	5.8739	-0.0373	0	0.0249	0.1181	15.6366
At2g23660	4	14	60.91	5.1743	0.0364	0	0.0219	0.1181	15.6186
At2g23660	5	12	57.54	17.4708	0.0694	0	0.0864	0.131	15.0354
At2g23780	1	10	41.49	5.057	-0.0148	0	0.0209	0.1375	19.8792
At2g23780	1	13	58.6	8.7032	0.0215	0	0.0395	0.1422	15.8879
At2g23780	1	15	70.45	8.3605	0.019	0	0.035	0.1377	19.8603
At2g23780	1	18	81.79	5.0429	0.0146	0	0.0227	0.1254	23.5627
At2g23780	2	5	19.97	4.6042	0.0143	0	0.0186	0.1562	16.0505
At2g23780	2	10	42.44	6.4567	-0.0165	0	0.0268	0.1374	19.8474
At2g23780	3	15	64.5	8.9259	0.0186	0	0.0373	0.1375	19.8358
At2g23780	5	3	13.82	6.0227	0.0161	0	0.0282	0.1423	20.3163
At2g23760	2	6	23.48	11.4234	-0.024	0	0.0527	0.0527	28.4954
At2g23760	2	9	39.45	18.7803	-0.0343	0	0.1004	0.1004	22.8559
At2g30150	2	3	10.59	17.7241	-0.0241	0	0.0791	0.0968	7.4582
At2g30150	2	5	21.97	12.1089	-0.0207	0	0.058	0.0756	10.0182
At2g30150	3	15	64.5	4.0883	0.0115	0	0.0177	0.0968	7.4557
At2g30140	1	4	15.26	4.5462	-0.0164	0	0.0143	0.3424	65.6563
At2g30140	1	12	51.31	5.8224	0.0188	0	0.0179	0.3603	48.2542
At2g30140	1	14	61.51	4.4336	0.0161	0	0.0137	0.3561	51.8133
At2g30140	2	10	44.44	60.8961	-0.0828	0	0.2417	0.4114	78.9429
At2g30140	2	12	55.87	50.2181	-0.0706	0	0.2294	0.2489	139.995
At2g30140	2	13	58.77	9.4608	-0.0305	0	0.0327	0.346	70.8919
At2g30140	5	7	32.6	6.9811	0.0216	0	0.0251	0.3478	62.708
At2g30110	1	10	43.49	11.2417	-0.0253	0	0.0456	0.2178	25.2101
At2g30110	1	14	65.51	17.602	0.0358	0	0.0781	0.2338	15.3887
At2g30110	2	7	28.43	4.2105	0.0172	0	0.0156	0.2282	15.2971
At2g30110	2	10	42.44	13.3886	-0.0275	0	0.0523	0.2138	26.3235
At2g30110	2	11	48.91	8.4964	-0.0247	0	0.0401	0.2016	25.906
At2g30110	3	12	53.88	6.2482	-0.0206	0	0.0246	0.2372	20.3726
At2g30110	3	17	74.48	16.1076	0.0283	0	0.0625	0.2126	26.1189
At2g30110	4	13	55.4	4.0521	0.015	0	0.015	0.2276	19.5555
At2g30110	5	5	20.82	8.1414	0.0206	0	0.0329	0.2155	28.253
At2g30110	5	15	73.51	5.2876	-0.0162	0	0.0195	0.2321	15.7841
At2g30100	2	3	10.59	6.0926	-0.0179	0	0.0261	0.109	15.3293
At2g30100	2	10	46.44	8.5321	-0.0239	0	0.0391	0.1127	14.8127
At2g30100	2	13	56.77	10.1147	-0.0245	0	0.0433	0.1169	11.2689
At2g30100	4	14	64.91	7.8555	-0.0206	0	0.0347	0.1103	15.1906
At2g30090	3	16	73.38	12.69	-0.065	0	0.0604	0.0913	2.0908
At2g30090	5	15	73.51	8.8568	-0.0528	0	0.0392	0.086	2.1586
At2g30080	5	1	0.01	4.8259	0.0186	0	0.0226	0.0226	119.723
At2g30070	2	6	23.48	7.8444	-0.0163	0	0.0341	0.1007	22.4859
At2g30070	2	9	41.45	4.4729	0.0154	0	0.0204	0.1211	30.2612
At2g30070	3	2	4.2	5.0859	0.013	0	0.0214	0.1231	22.0817
At2g30070	4	16	70.87	4.0657	-0.0115	0	0.0167	0.1399	21.7693
At2g30070	5	2	6.75	5.6375	0.0145	0	0.0264	0.1261	23.226
At2g30070	5	12	63.54	7.6837	-0.0178	0	0.0399	0.1319	22.2891
At2g30070	5	15	75.51	4.1976	-0.0124	0	0.0191	0.111	19.6473
At2g30060	2	9	41.45	21.5229	-0.0216	0	0.0941	0.1822	1.65
At2g30060	2	12	53.87	3.9916	-0.0103	0	0.02	0.1081	4.0439
At2g30060	3	13	56.54	20.7324	0.0211	0	0.0967	0.199	2.2832
At2g30060	3	16	71.38	12.4633	0.0158	0	0.0557	0.158	2.7448
At2g30060	4	12	50.61	5.7095	0.0103	0	0.0228	0.1699	1.1338
At2g30060	4	14	60.91	6.981	0.0117	0	0.0278	0.1748	1.3332
At2g30210	1	11	48.63	4.8887	-0.0303	0	0.0219	0.1463	5.4214
At2g30210	3	17	76.48	10.632	0.0442	0	0.0472	0.1432	5.6095
At2g30210	4	7	30.68	4.1442	-0.0279	0	0.0186	0.1456	5.2933
At2g30210	5	7	28.6	12.8138	0.0468	0	0.0536	0.1433	5.413
At2g30210	5	8	35.59	8.1879	0.0406	0	0.0396	0.1293	7.0818
At2g30200	4	14	62.91	4.6548	-0.011	0	0.0235	0.0478	155.869
At2g30200	5	15	75.51	5.4624	0.0115	0	0.0282	0.0369	160.788
At2g30200	5	17	87.45	7.739	0.0136	0	0.0366	0.0453	154.437
At2g30160	2	11	46.91	6.2677	0.0156	0	0.0282	0.0647	26.5475
At2g30160	3	9	40.87	4.6113	-0.0128	0	0.0215	0.0659	26.8121
At2g30160	3	15	64.5	5.7168	0.015	0	0.0257	0.0618	24.9837
At2g30160	3	17	76.48	5.5146	0.0139	0	0.0256	0.0617	26.6873
At2g30240	2	2	5.53	6.0522	0.0441	0	0.0277	0.049	4.8679
At2g30240	5	6	23.51	4.4232	0.0376	0	0.0201	0.049	4.8683
At2g30130	1	21	92.93	4.1385	0.0364	0	0.019	0.0402	5.8178
At2g30130	3	1	0.01	4.8451	-0.0396	0	0.0223	0.0403	5.8142
At2g30050	1	4	17.26	5.6323	0.0101	0	0.025	0.2093	56.6343
At2g30050	2	10	42.44	23.1661	-0.0214	0	0.0988	0.1605	99.3247
At2g30050	3	17	76.48	4.5863	0.0087	0	0.0186	0.2215	56.7391
At2g30050	5	4	16.85	4.5654	0.0089	0	0.0194	0.2053	67.9481
At2g30050	5	6	27.51	4.2886	0.0086	0	0.018	0.2039	64.0928
At2g30050	5	16	82.93	11.6438	-0.0142	0	0.0463	0.2042	66.3158
At2g30250	1	1	0.01	4.2501	-0.0151	0	0.0162	0.2051	3.7389
At2g30250	1	18	79.79	4.8953	-0.0161	0	0.0186	0.2076	3.9646
At2g30250	2	3	14.59	8.5237	-0.0225	0	0.0358	0.1919	4.194
At2g30250	2	6	25.48	8.9169	-0.0237	0	0.0399	0.196	4.2932
At2g30250	3	12	49.88	12.7107	0.027	0	0.0518	0.1646	5.1452
At2g30250	3	14	63.81	3.9732	0.0179	0	0.0169	0.1408	7.3192
At2g30250	4	1	4.01	8.9297	0.0298	0	0.0384	0.2274	4.5588
At2g30250	4	4	18.7	6.1192	-0.0191	0	0.0251	0.1904	4.0847
At2g30250	5	17	85.45	12.3016	0.0281	0	0.0536	0.1983	3.8422
At2g30170	1	16	70.5	15.4834	0.014	0	0.0641	0.1589	14.319
At2g30170	1	18	81.79	6.8186	0.0096	0	0.0302	0.125	18.6598
At2g30170	3	1	0.01	9.5196	0.0109	0	0.0388	0.1588	14.3238
At2g30170	3	7	27.17	4.501	0.0077	0	0.0177	0.1766	13.0959
At2g30170	3	15	64.5	4.5375	0.0076	0	0.0185	0.1501	15.2176
At2g30170	3	17	76.48	6.1105	0.0091	0	0.027	0.1586	14.8907
At2g30170	4	12	50.61	6.2613	0.0092	0	0.0253	0.1589	14.3231
At2g30170	5	16	78.93	4.4578	0.0077	0	0.0179	0.1589	14.3219
At2g30170	5	19	92.94	7.0529	-0.0126	0	0.0276	0.1865	15.1096
At2g30120	3	3	9.14	4.4761	-0.0164	0	0.0195	0.0911	8.6884
At2g30120	4	6	26.04	3.9343	-0.016	0	0.0187	0.1099	7.8816
At2g30120	5	2	8.75	15.0084	0.0314	0	0.0712	0.0977	9.4577
At2g23040	1	16	74.5	4.6039	0.0408	0	0.0233	0.0463	4.7143
At2g23040	3	10	41.59	5.4928	-0.0425	0	0.0252	0.0437	4.6489
At2g23060	2	4	15.29	9.0593	0.0512	0	0.0376	0.1439	0.3578
At2g23060	2	14	62	10.3071	-0.058	0	0.0429	0.1439	0.358
At2g23060	4	1	2.01	12.6824	-0.0717	0	0.0631	0.1626	0.6451
At2g23060	5	1	0.01	4.845	0.0374	0	0.02	0.1385	0.7112
At2g23060	5	3	11.82	6.5975	0.0466	0	0.031	0.1495	0.3521
At2g23060	5	10	48.02	5.0538	-0.0396	0	0.0226	0.1665	0.1704
At2g23060	5	18	91.76	8.331	0.053	0	0.039	0.1498	0.4318
At2g23070	1	11	50.63	3.903	0.0084	0	0.0196	0.1577	949.328
At2g23070	3	17	74.48	7.4659	0.0106	0	0.031	0.1381	910.531
At2g23070	4	1	0.01	5.2391	0.0096	0	0.0216	0.1381	910.602
At2g23070	5	4	14.85	4.7393	0.0088	0	0.0196	0.1379	910.732
At2g23070	5	11	53.75	8.5513	0.012	0	0.038	0.1405	915.736
At2g23100	1	13	56.6	4.1468	0.0367	0	0.0171	0.1366	2.3622
At2g23100	1	17	75.76	7.802	-0.0504	0	0.0325	0.1366	2.3604
At2g23100	2	3	14.59	11.959	0.0588	0	0.0535	0.14	2.3658
At2g23100	2	14	62	6.3673	-0.0431	0	0.0264	0.1366	2.3609
At2g23100	5	8	33.59	4.1461	-0.0352	0	0.0169	0.1535	2.0042
At2g23100	5	12	55.54	5.7108	0.0385	0	0.0237	0.1366	2.3625
At2g22960	3	5	18.19	6.0127	0.0426	0	0.0248	0.1434	1.0521
At2g22960	4	2	9.14	15.1364	0.093	0	0.0667	0.1439	1.019
At2g22960	4	6	24.04	11.4271	-0.0768	0	0.0477	0.1433	1.0529
At2g22960	4	11	50.15	6.7401	0.0634	0	0.0287	0.1721	0.5157
At2g22960	5	6	23.51	6.1789	-0.0433	0	0.0255	0.1434	1.0538
At2g23030	1	6	27.24	6.9844	-0.0474	0	0.0356	0.0701	7.3805
At2g23030	1	12	53.31	4.0529	0.0375	0	0.0208	0.0849	8.1401
At2g23030	5	9	44.19	8.2566	0.0507	0	0.0409	0.0688	8.01
At2g22950	1	7	31.84	5.5617	-0.04	0	0.0237	0.1451	1.8302
At2g22950	2	13	58.77	11.284	0.0632	0	0.0523	0.1532	1.5611
At2g22950	3	8	34.93	5.1188	-0.0387	0	0.0226	0.1371	2.0318
At2g22950	3	11	46.27	7.0734	-0.0441	0	0.0292	0.1436	2.0017
At2g22950	5	6	27.51	7.5897	0.0478	0	0.0346	0.1247	2.3138
At2g22950	5	8	37.59	14.5276	0.0704	0	0.075	0.165	2.4055
At2g23000	1	4	15.26	9.6596	-0.0375	0	0.0341	0.273	1.994
At2g23000	1	21	92.93	6.0319	0.0293	0	0.0211	0.273	1.9963
At2g23000	2	4	17.29	13.7843	0.0564	0	0.0561	0.2885	2.4653
At2g23000	2	9	41.45	52.205	-0.1071	0	0.22	0.2684	2.0288
At2g23080	2	8	32.43	4.5699	-0.0122	0	0.0186	0.1525	16.685
At2g23080	2	10	42.44	8.5128	-0.0176	0	0.0342	0.1682	14.7915
At2g23080	2	15	68.77	7.2753	-0.0166	0	0.0314	0.1703	15.0658
At2g23080	4	4	14.7	12.1308	0.0243	0	0.0493	0.1681	14.818
At2g23080	4	7	32.68	8.0553	-0.0198	0	0.035	0.172	14.6514
At2g23080	4	10	44.32	4.9032	-0.0136	0	0.0213	0.1583	17.6002
At2g23080	5	1	2.01	5.7744	-0.0142	0	0.0261	0.173	14.5515
At2g23080	5	7	32.6	9.4026	0.0187	0	0.0406	0.209	11.1269
At2g23080	5	9	44.19	6.4424	0.0148	0	0.0279	0.1963	10.6743
At2g23140	2	14	62	6.4504	-0.021	0	0.0271	0.1268	18.4124
At2g23140	4	6	28.04	6.1548	-0.0199	0	0.0266	0.128	18.4394
At2g23140	5	4	16.85	5.3529	0.0194	0	0.0251	0.1299	19.7169
At2g23140	5	13	68.48	12.0994	-0.0335	0	0.0547	0.1227	18.9829
At2g23140	5	14	70.7	7.1836	-0.0227	0	0.0343	0.1011	29.9472
At2g23140	5	18	87.76	8.2841	0.0276	0	0.0348	0.1293	19.716
At2g23090	2	10	42.44	11.4005	-0.0163	0	0.0494	0.1192	23.0685
At2g23090	3	17	76.48	5.8304	0.011	0	0.0257	0.1168	23.0914
At2g23090	5	1	0.01	4.0626	-0.0102	0	0.0171	0.1186	22.9826
At2g23090	5	5	18.82	10.5847	0.0169	0	0.0454	0.1184	23.0208
At2g23090	5	13	66.48	5.6445	-0.0111	0	0.0239	0.1186	22.9901
At2g23130	3	6	22.4	10.6512	0.0302	0	0.0456	0.1185	8.3428
At2g23130	3	16	73.38	9.8751	0.0309	0	0.0466	0.1264	7.817
At2g23130	4	11	46.15	6.6522	0.0244	0	0.0283	0.1185	8.3424
At2g23130	5	12	63.54	4.4432	-0.0208	0	0.0215	0.1216	8.787
At2g23120	2	8	36.43	5.0867	-0.0201	0	0.0246	0.0769	13.3168
At2g23120	2	10	46.44	7.8648	-0.0228	0	0.0364	0.0886	15.2991
At2g23120	3	5	22.19	4.2036	0.0148	0	0.018	0.1221	7.5227
At2g23120	4	3	13.66	7.0333	0.0265	0	0.0345	0.1298	6.2581
At2g23120	4	7	28.68	10.1182	-0.029	0	0.0432	0.1215	7.5484
At2g22990	2	15	68.77	7.2494	-0.0104	0	0.0325	0.1117	41.8844
At2g22990	4	4	14.7	5.643	-0.0095	0	0.024	0.1138	41.3633
At2g22990	4	11	46.15	10.6131	0.013	0	0.0457	0.1138	41.3205
At2g22990	4	13	59.4	5.988	0.0112	0	0.028	0.0961	40.6777
At2g22990	4	17	76.59	11.8172	-0.0132	0	0.0527	0.1142	41.8421
At2g23110	2	3	10.59	10.1505	-0.0583	0	0.0419	0.1497	4.6809
At2g23110	2	5	21.97	13.0759	-0.0652	0	0.0624	0.0797	5.0965
At2g23110	2	8	32.43	9.0791	-0.0557	0	0.0377	0.1501	4.667
At2g23110	3	13	54.54	5.1727	0.0385	0	0.0211	0.1497	4.6825
At2g22970	2	8	34.43	61.4543	-0.0626	0	0.2593	0.3116	8.2383
At2g22970	4	17	76.59	4.8057	-0.0157	0	0.0162	0.3138	3.4283
At2g22970	5	1	4.01	13.7681	0.0323	0	0.0505	0.3019	5.0812
At2g22970	5	5	18.82	7.6248	-0.0235	0	0.0259	0.2974	4.5827
At2g22970	5	16	82.93	4.204	0.0154	0	0.0149	0.2986	4.5468
At2g22980	1	18	79.79	5.1515	-0.0192	0	0.0219	0.1147	11.8821
At2g22980	2	5	21.97	12.9865	0.0349	0	0.0664	0.0865	8.7107
At2g22980	2	8	32.43	21.9725	0.0455	0	0.0992	0.1193	11.2174
At2g22980	2	12	51.87	4.282	-0.0212	0	0.0181	0.1147	11.8837
At2g23150	1	10	43.49	4.0736	-0.0149	0	0.0172	0.1662	24.7894
At2g23150	2	2	5.53	5.5262	-0.0176	0	0.0233	0.1211	25.5996
At2g23150	2	8	34.43	10.3886	-0.0273	0	0.0486	0.1241	37.1599
At2g23150	2	10	44.44	18.8267	-0.0383	0	0.0906	0.1661	27.8855
At2g23150	3	2	4.2	4.0679	0.0148	0	0.0168	0.1367	24.3412
At2g23150	3	5	18.19	7.0763	0.0194	0	0.029	0.1489	26.8751
At2g23150	4	17	74.59	4.9293	-0.0161	0	0.0196	0.1686	19.3766
At2g02580	1	7	29.84	4.9258	-0.0407	0	0.0214	0.0955	5.2968
At2g02580	2	2	5.53	8.5528	-0.0536	0	0.0374	0.0956	5.2985
At2g02580	2	12	51.87	5.9506	0.05	0	0.0259	0.0956	5.2957
At2g02580	4	2	9.14	6.8031	0.0522	0	0.0308	0.0972	5.3611
At2g02580	4	12	50.61	4.4143	-0.0388	0	0.0187	0.1144	4.7844
At2g02570	2	4	17.29	6.7966	0.0243	0	0.033	0.0796	9.3055
At2g02570	2	7	28.43	7.7792	0.0253	0	0.0345	0.0811	11.2602
At2g02570	2	13	58.77	10.892	-0.0351	0	0.0565	0.0968	13.1092
At2g02570	3	17	74.48	4.7485	0.019	0	0.0209	0.0811	11.2625
At2g02570	5	7	30.6	4.0793	0.0183	0	0.0194	0.1005	9.7409
At2g02560	1	1	4.01	5.3831	-0.0185	0	0.0231	0.1537	11.125
At2g02560	1	9	39.83	3.8607	-0.0191	0	0.0182	0.1675	9.3602
At2g02560	1	12	55.31	4.7258	0.0174	0	0.0206	0.1508	12.0699
At2g02560	2	10	42.44	14.9568	-0.0327	0	0.0653	0.1172	11.2297
At2g02560	3	17	74.48	4.0315	0.0154	0	0.0164	0.1493	11.8479
At2g02550	4	11	46.15	8.2808	0.0627	0	0.0364	0.0917	2.9089
At2g02550	4	17	74.59	6.2233	-0.0523	0	0.0272	0.0917	2.9089
At2g02550	5	19	92.94	4.5824	-0.047	0	0.0204	0.0732	3.5865
At2g02540	4	9	37.79	6.1255	-0.0331	0	0.0264	0.1089	13.639
At2g02540	4	15	65.15	7.5125	-0.0372	0	0.0323	0.1086	13.6047
At2g02540	5	3	13.82	4.0115	0.0269	0	0.0189	0.1275	12.8414
At2g02540	5	11	53.75	6.2729	0.0346	0	0.0321	0.1162	13.3264
At2g02530	1	3	10.36	4.6671	0.0429	0	0.0216	0.0484	3.5293
At2g02530	2	12	51.87	6.4517	-0.0546	0	0.0296	0.0481	3.5232
At2g02520	1	22	101.88	4.046	-0.0389	0	0.0182	0.0981	6.0572
At2g02520	2	13	58.77	9.4555	-0.0672	0	0.0467	0.1105	6.076
At2g02520	5	4	14.85	4.6119	-0.0469	0	0.0203	0.1004	6.0688
At2g02520	5	8	33.59	10.5892	0.0707	0	0.0464	0.0996	6.0216
At2g02510	1	5	20.24	8.0086	-0.0149	0	0.0341	0.1194	50.6084
At2g02510	1	16	70.5	8.7117	0.0153	0	0.0371	0.1194	50.6088
At2g02510	3	10	41.59	7.735	-0.0147	0	0.0329	0.1194	50.6086
At2g02510	3	17	74.48	5.2691	0.0121	0	0.0223	0.1194	50.6249
At2g02510	5	5	18.82	4.7409	0.0112	0	0.02	0.1193	50.6603
At2g02510	5	11	49.75	4.0659	-0.0109	0	0.0168	0.1362	62.164
At2g02680	3	6	22.4	5.189	-0.0428	0	0.0243	0.0243	1.0344
At2g02490	2	8	36.43	5.249	0.0417	0	0.0256	0.055	2.8359
At2g02490	2	11	46.91	7.7576	0.052	0	0.035	0.0644	2.9244
At2g02490	4	14	62.91	6.2612	-0.0469	0	0.0316	0.0705	2.6937
At2g02670	4	11	48.15	8.5995	0.0597	0	0.0446	0.0446	3.1078
At2g02660	5	12	55.54	5.1347	-0.0434	0	0.024	0.024	2.457
At2g02650	1	5	22.24	4.7143	0.04	0	0.0211	0.1604	0.5217
At2g02650	4	1	0.01	4.3325	0.0388	0	0.018	0.1296	0.4362
At2g02650	4	3	13.66	6.9075	0.0516	0	0.0326	0.1442	0.0971
At2g02650	5	11	49.75	5.3044	0.0413	0	0.0225	0.1142	0.2866
At2g02650	5	15	77.51	5.8235	0.0594	0	0.0288	0.1184	0.4861
At2g02650	5	19	92.94	4.0819	-0.0377	0	0.0178	0.0895	0.9585
At2g02640	4	17	76.59	11.2976	-0.0676	0	0.053	0.083	3.0301
At2g02640	5	16	78.93	6.9831	-0.0526	0	0.031	0.0787	3.0037
At2g02630	2	14	62	4.5851	0.0332	0	0.0211	0.0394	4.6534
At2g02630	5	10	46.02	4.0221	0.0296	0	0.0185	0.0394	4.6525
At2g02620	2	11	46.91	4.813	-0.0428	0	0.0211	0.086	2.4618
At2g02620	4	11	46.15	9.4709	0.0677	0	0.0421	0.0863	2.4574
At2g02620	4	14	62.91	5.3911	-0.0559	0	0.0294	0.092	2.6692
At2g02620	5	13	66.48	6.3613	-0.0459	0	0.028	0.0861	2.4608
At2g02610	4	3	11.66	4.8406	-0.0484	0	0.0252	0.0252	6.4857
At2g02515	1	6	29.24	9.3764	-0.0446	0	0.0398	0.1538	2.4694
At2g02515	3	8	32.93	4.6141	-0.0296	0	0.0183	0.1705	2.8743
At2g02515	4	14	60.91	10.4279	-0.0473	0	0.0439	0.1338	2.1773
At2g02515	5	1	4.01	12.1372	0.0508	0	0.0531	0.1552	2.3525
At2g02515	5	12	55.54	4.283	-0.0288	0	0.0174	0.1521	2.4651
At2g02590	1	9	39.83	10.6942	-0.023	0	0.046	0.1504	4.977
At2g02590	1	14	61.51	9.1543	0.0206	0	0.0379	0.1456	4.8515
At2g02590	2	9	41.45	11.4045	-0.0237	0	0.0523	0.132	5.9028
At2g02590	5	9	42.19	5.2423	0.0145	0	0.0215	0.1456	4.8517
At2g02500	1	16	72.5	8.6346	0.0168	0	0.0424	0.1686	118.497
At2g02500	2	10	42.44	15.1867	-0.0221	0	0.0627	0.1603	94.0486
At2g02500	3	2	4.2	4.8766	-0.0119	0	0.0192	0.176	145.594
At2g02500	3	8	32.93	4.6816	0.0113	0	0.0189	0.1567	157.297
At2g02500	4	6	24.04	6.5815	0.0135	0	0.0267	0.1567	157.321
At2g02500	4	8	37.6	3.8734	0.0104	0	0.0161	0.1461	210.763
At2g02500	5	15	73.51	5.6839	-0.0125	0	0.023	0.1567	157.269
At2g02480	1	1	0.01	4.7394	-0.0345	0	0.0199	0.1255	4.4843
At2g02480	2	1	0.01	4.0429	-0.0316	0	0.0169	0.1255	4.4855
At2g02480	4	4	16.7	6.4046	0.0442	0	0.0304	0.1322	4.4299
At2g02480	5	3	13.82	7.1196	0.0539	0	0.0323	0.1268	4.4504
At2g02480	5	7	28.6	13.8184	-0.0736	0	0.0592	0.1254	4.4895
At2g43880	5	2	8.75	6.5963	0.0495	0	0.0322	0.05	3.8203
At2g43880	5	19	96.94	4.7032	0.043	0	0.0231	0.0482	3.9524
At2g43980	2	10	42.44	9.221	-0.0218	0	0.0428	0.0428	118.064
At2g43980	2	12	55.87	7.3397	-0.0202	0	0.0354	0.0354	117.415
At2g43990	1	20	90.37	9.4555	0.0429	0	0.0397	0.1332	8.5854
At2g43990	3	12	51.88	5.6618	0.034	0	0.0247	0.1349	8.713
At2g43990	4	6	28.04	11.2722	0.0481	0	0.0494	0.1351	8.6797
At2g43990	4	9	41.79	5.2939	0.0333	0	0.0231	0.1089	9.4391
At2g43990	5	16	78.93	6.5121	-0.0364	0	0.0272	0.1332	8.5883
At2g44010	1	2	7.05	10.23	-0.0544	0	0.0484	0.1783	10.2225
At2g44010	1	3	12.36	9.2866	-0.0518	0	0.0433	0.1732	10.2997
At2g44010	1	15	66.45	4.8293	0.0344	0	0.0193	0.167	10.8136
At2g44010	2	3	14.59	3.898	-0.0321	0	0.0166	0.1837	9.4268
At2g44010	2	13	56.77	4.154	0.034	0	0.0162	0.1833	9.8124
At2g44010	3	15	64.5	6.2237	0.0399	0	0.0257	0.1428	13.5349
At2g44010	3	17	76.48	10.8967	0.0526	0	0.0456	0.1628	10.718
At2g44010	5	9	44.19	5.3398	0.0385	0	0.0231	0.1702	10.8073
At2g44010	5	16	80.93	12.055	0.0592	0	0.053	0.1758	10.0077
At2g44010	5	18	89.76	4.1187	0.0347	0	0.0188	0.1415	9.575
At2g44030	2	15	66.77	4.207	0.0445	0	0.0175	0.1279	20.6659
At2g44030	4	2	5.14	13.4282	-0.0771	0	0.0574	0.1292	19.6212
At2g44030	4	6	24.04	14.5123	0.0713	0	0.0621	0.129	19.5837
At2g44030	4	8	35.6	5.3407	0.0426	0	0.0265	0.0935	16.8488
At2g44030	5	3	9.82	6.5231	0.0427	0	0.0274	0.1289	19.5653
At2g43890	1	18	81.79	9.974	0.0583	0	0.0522	0.0883	3.3733
At2g43890	3	8	32.93	4.1316	-0.031	0	0.0176	0.1074	3.7188
At2g43890	3	10	43.59	3.9151	-0.032	0	0.0191	0.1089	3.4517
At2g43890	4	4	18.7	6.5995	0.0409	0	0.0301	0.0914	2.4889
At2g44070	1	18	79.79	19.9846	0.0473	0	0.0765	0.2299	17.9583
At2g44070	1	19	87.52	8.6626	0.0335	0	0.0383	0.1917	19.7764
At2g44070	2	10	42.44	23.0591	-0.0546	0	0.0899	0.2316	18.0427
At2g44070	3	1	0.01	6.4679	0.0265	0	0.024	0.2299	17.9554
At2g44070	3	3	11.14	5.323	0.0249	0	0.0209	0.2269	20.3332
At2g44070	3	15	66.5	6.8565	0.029	0	0.0287	0.2182	23.7996
At2g44080	1	1	2.01	6.8664	-0.0337	0	0.0303	0.1933	2.7451
At2g44080	2	6	25.48	23.9655	-0.0645	0	0.1079	0.2088	2.113
At2g44080	2	14	64	4.5958	0.0292	0	0.02	0.1935	3.0373
At2g44080	3	2	4.2	6.5189	-0.0308	0	0.0254	0.1898	2.5259
At2g44080	5	17	87.45	7.7368	0.0348	0	0.0311	0.1907	2.4963
At2g44190	4	16	72.87	6.5545	-0.0338	0	0.032	0.032	30.9117
At2g43920	2	4	19.29	4.9318	0.0121	0	0.0201	0.1857	19.7808
At2g43920	2	8	32.43	11.2753	-0.0186	0	0.0448	0.1841	19.4826
At2g43920	2	9	39.45	4.7915	-0.0124	0	0.0222	0.1616	14.1468
At2g43920	5	13	66.48	29.6207	-0.0291	0	0.1232	0.185	19.3121
At2g43920	5	16	82.93	17.353	0.0233	0	0.0747	0.1906	19.9802
At2g43920	5	19	94.94	6.1214	0.0126	0	0.0269	0.1428	30.0043
At2g43930	2	14	62	7.0373	-0.0418	0	0.0321	0.0518	64.6247
At2g43930	4	1	0.01	6.1991	-0.0394	0	0.0283	0.0518	64.6017
At2g43940	2	2	5.53	4.7316	-0.0121	0	0.0204	0.1004	33.3311
At2g43940	2	5	19.97	6.7111	-0.0155	0	0.0289	0.1089	32.2574
At2g43940	2	10	44.44	8.3097	-0.0202	0	0.0439	0.1173	31.358
At2g43940	2	12	55.87	5.1933	-0.0145	0	0.0244	0.0978	37.2903
At2g44100	1	18	83.79	5.8695	0.0117	0	0.0267	0.1227	428.257
At2g44100	1	21	94.93	6.7158	0.0126	0	0.0309	0.127	449.953
At2g44100	2	10	42.44	21.3898	-0.0232	0	0.0937	0.1228	439.253
At2g44100	2	12	55.87	4.4935	-0.0114	0	0.0214	0.0505	720.233
At2g44100	5	9	44.19	3.9991	0.01	0	0.0194	0.1426	391.809
At2g44040	1	21	92.93	4.2262	0.0113	0	0.0176	0.1289	19.3992
At2g44040	3	13	54.54	8.2906	0.0161	0	0.0349	0.1289	19.396
At2g44040	4	5	21.45	4.5117	0.0129	0	0.0221	0.107	21.156
At2g44040	4	12	52.61	5.0111	-0.0146	0	0.0225	0.1236	22.8025
At2g44040	4	15	65.15	6.6478	-0.0149	0	0.0279	0.1289	19.3974
At2g44130	1	1	0.01	5.3739	-0.0213	0	0.0231	0.1031	6.048
At2g44130	1	21	92.93	7.7907	0.0257	0	0.0337	0.1031	6.0521
At2g44130	4	14	60.91	5.6043	-0.0224	0	0.0241	0.1031	6.0521
At2g44130	5	8	33.59	4.8413	0.0201	0	0.0208	0.103	6.0517
At2g44065	2	10	42.44	9.9312	-0.0137	0	0.042	0.1348	77.8015
At2g44065	2	12	55.87	15.6346	-0.0178	0	0.0683	0.1612	73.5267
At2g44065	3	15	68.5	7.724	0.0115	0	0.0336	0.1587	67.8658
At2g44065	5	7	30.6	4.8174	0.0096	0	0.0232	0.1552	61.1411
At2g44065	5	8	41.59	6.3668	0.0108	0	0.0284	0.1603	69.1701
At2g44065	5	19	92.94	4.4566	-0.0111	0	0.0185	0.133	76.1782
At2g44060	1	18	81.79	4.0711	0.0135	0	0.0186	0.1104	92.2329
At2g44060	2	2	9.53	13.0467	-0.0315	0	0.0629	0.0898	104.57
At2g44060	2	6	23.48	9.5811	0.0265	0	0.0422	0.0918	101.308
At2g44060	3	14	61.81	4.8191	0.0152	0	0.0233	0.0951	101.179
At2g44120	2	15	68.77	22.9968	-0.022	0	0.1111	0.1111	15.636
At2g43970	1	6	29.24	7.3221	-0.0358	0	0.0296	0.2012	21.0985
At2g43970	1	15	70.45	3.8935	0.0262	0	0.0147	0.2143	22.6826
At2g43970	1	19	85.52	5.9214	0.032	0	0.0222	0.2218	23.7801
At2g43970	2	9	41.45	24.6488	-0.0716	0	0.1078	0.2143	19.9409
At2g43970	2	12	55.87	11.6936	-0.0521	0	0.0517	0.1582	32.6112
At2g43970	3	13	58.54	4.5769	-0.0379	0	0.0213	0.2017	19.3316
At2g43970	3	17	74.48	10.4421	0.0527	0	0.0406	0.1996	20.8307
At2g43970	5	3	11.82	5.5824	0.0337	0	0.0258	0.1959	21.6677
At2g43970	5	5	22.82	7.7559	0.0365	0	0.031	0.2011	20.9871
At2g44020	5	3	13.82	5.711	0.012	0	0.0272	0.0701	21.3237
At2g44020	5	10	46.02	5.8316	0.0118	0	0.0261	0.0681	20.6555
At2g44150	2	3	10.59	5.9152	-0.0151	0	0.0268	0.0591	129.563
At2g44150	2	6	23.48	6.787	0.021	0	0.029	0.1111	77.4327
At2g44150	2	14	64	6.784	0.0169	0	0.0305	0.1288	69.8916
At2g43950	3	2	4.2	6.745	-0.011	0	0.0303	0.0673	305.783
At2g43950	5	4	14.85	7.9923	0.0119	0	0.0355	0.0881	356.61
At2g44090	2	5	21.97	4.6437	-0.0156	0	0.0259	0.1069	484.22
At2g44090	2	8	32.43	6.6483	-0.0164	0	0.0286	0.1097	434.722
At2g44090	3	16	73.38	14.4694	0.0247	0	0.0653	0.1126	446.197
At2g44090	5	5	18.82	5.608	0.0151	0	0.0241	0.1097	434.341
At2g44160	1	4	17.26	3.9269	-0.0147	0	0.0194	0.1095	15.0593
At2g44160	2	10	42.44	6.494	-0.0189	0	0.0292	0.0722	19.8305
At2g44160	3	17	76.48	9.3866	0.0218	0	0.0436	0.0909	19.5505
At2g44050	2	10	42.44	5.0937	-0.0097	0	0.0239	0.0239	49.0416
At2g44050	2	12	55.87	12.1488	-0.016	0	0.0624	0.0624	37.4982
At2g44180	4	11	46.15	7.1258	-0.0176	0	0.0318	0.0754	60.7709
At2g44180	5	13	68.48	5.3569	-0.0173	0	0.0242	0.0753	60.8369
At2g44180	5	17	83.45	12.3881	0.0275	0	0.0559	0.0754	60.731
At2g44170	1	8	34.23	4.7982	-0.0382	0	0.0208	0.0965	6.5636
At2g44170	1	16	74.5	7.5345	0.0498	0	0.0355	0.1005	6.3161
At2g44170	4	1	4.01	7.0411	-0.0522	0	0.034	0.1007	6.7599
At2g44170	5	9	42.19	5.4887	0.0403	0	0.024	0.0968	6.5752
At2g30890	1	10	41.49	5.6964	0.0219	0	0.0227	0.1738	7.8111
At2g30890	2	8	32.43	15.4476	-0.0383	0	0.0685	0.1048	20.2627
At2g30890	2	11	48.91	36.0508	-0.0655	0	0.1706	0.207	5.641
At2g30890	2	13	58.77	9.842	-0.0348	0	0.0498	0.0861	19.5917
At2g30890	4	16	70.87	7.1768	-0.0247	0	0.0286	0.1738	7.7983
At2g30900	1	11	46.63	4.0531	-0.0367	0	0.0172	0.1142	1.2893
At2g30900	2	11	48.91	24.8069	0.1069	0	0.1218	0.1369	0.8655
At2g30910	1	16	74.5	3.8756	0.0116	0	0.019	0.0779	47.7589
At2g30910	1	19	85.52	8.9607	0.0168	0	0.0391	0.0981	46.1105
At2g30910	2	5	19.97	8.692	0.0181	0	0.0379	0.0981	46.1225
At2g30910	2	10	44.44	5.3067	-0.016	0	0.0266	0.105	46.4128
At2g30910	4	1	0.01	3.8571	0.0115	0	0.0163	0.1144	44.3387
At2g30910	4	7	30.68	4.9417	-0.0131	0	0.0242	0.1223	38.1236
At2g30910	5	1	0.01	7.7208	-0.0157	0	0.0336	0.0981	46.0981
At2g30940	1	13	56.6	4.3823	0.0379	0	0.0198	0.0574	2.8052
At2g30940	1	15	70.45	7.0071	0.0477	0	0.0315	0.0691	2.1338
At2g30940	4	17	76.59	5.0397	0.0411	0	0.0232	0.0687	2.1377
At2g30940	5	9	42.19	4.9204	0.04	0	0.022	0.0689	2.1345
At2g30950	2	1	0.01	8.7633	-0.0271	0	0.036	0.1501	72.176
At2g30950	2	7	28.43	5.3777	0.0259	0	0.0225	0.1271	106.325
At2g30950	2	9	41.45	7.4716	-0.0267	0	0.0343	0.1037	164.836
At2g30950	3	15	64.5	7.1967	0.0237	0	0.0298	0.1422	85.7291
At2g30950	3	17	76.48	9.1438	0.0268	0	0.0388	0.1513	72.0868
At2g30950	5	4	14.85	4.0978	0.0176	0	0.0164	0.1666	64.9508
At2g30950	5	15	73.51	3.9985	-0.0175	0	0.016	0.1661	60.0001
At2g30810	1	14	63.51	6.2761	-0.0485	0	0.0286	0.1172	3.9535
At2g30810	2	10	44.44	4.0083	0.0445	0	0.0195	0.0973	4.6409
At2g30810	2	12	55.87	8.14	0.0713	0	0.0397	0.1175	4.0596
At2g30810	4	7	30.68	9.5864	-0.0608	0	0.045	0.1193	3.6786
At2g30990	3	13	54.54	6.6007	0.0238	0	0.0308	0.0308	4.9182
At2g31000	1	22	101.88	6.8494	0.0359	0	0.0301	0.1237	23.2696
At2g31000	2	15	66.77	4.562	-0.0296	0	0.0191	0.123	23.2761
At2g31000	3	5	18.19	6.5399	0.0352	0	0.0276	0.123	23.2722
At2g31000	3	8	32.93	3.9011	-0.0348	0	0.016	0.1391	19.9864
At2g31000	3	13	54.54	4.7638	0.0298	0	0.02	0.1231	23.2598
At2g31000	3	15	66.5	5.4852	0.0328	0	0.0251	0.1281	16.0682
At2g31000	5	1	0.01	5.2971	0.0312	0	0.0223	0.1231	23.2549
At2g31010	2	5	21.97	7.4626	-0.033	0	0.0347	0.1343	8.2584
At2g31010	3	15	64.5	14.4039	0.0446	0	0.0615	0.1302	8.3267
At2g31010	3	17	76.48	8.5363	0.035	0	0.0383	0.1071	8.9362
At2g31010	4	13	59.4	4.2324	0.0263	0	0.0199	0.1333	8.6317
At2g31010	5	2	6.75	7.7022	0.0336	0	0.0355	0.1337	8.4569
At2g31030	2	10	42.44	8.2336	-0.0402	0	0.0369	0.0729	15.3141
At2g31030	2	12	55.87	6.7383	-0.0384	0	0.0325	0.0684	19.5166
At2g31030	3	11	48.27	8.1487	0.0399	0	0.0408	0.0776	15.8362
At2g31030	3	14	59.81	7.388	0.0363	0	0.0331	0.0699	13.7689
At2g31035	1	1	0.01	9.2385	0.0651	0	0.0392	0.1245	0.5392
At2g31035	1	5	22.24	7.6946	-0.0673	0	0.0409	0.1337	0.766
At2g31035	1	14	61.51	11.3198	0.0656	0	0.0483	0.1244	0.5401
At2g31035	2	10	42.44	3.9025	-0.04	0	0.0163	0.1407	0.7975
At2g31035	2	14	62	5.1158	-0.045	0	0.021	0.1454	1.3366
At2g31035	5	3	9.82	9.7953	-0.0606	0	0.0416	0.1245	0.5411
At2g30820	2	13	56.77	11.6054	0.0653	0	0.0524	0.0724	4.7336
At2g30820	3	4	14.28	4.6199	-0.0381	0	0.0208	0.0729	4.7157
At2g30820	3	6	24.4	4.9541	-0.0417	0	0.025	0.0771	5.149
At2g30830	2	1	0.01	4.7358	0.0397	0	0.0213	0.0623	2.4083
At2g30830	3	4	14.28	5.1536	-0.042	0	0.0237	0.0435	3.133
At2g30840	1	4	17.26	9.2089	-0.0551	0	0.0371	0.2697	7.6574
At2g30840	1	11	46.63	6.8917	-0.0441	0	0.0245	0.2636	7.8664
At2g30840	2	3	14.59	23.4253	-0.0833	0	0.0905	0.2696	7.4413
At2g30840	2	14	62	15.3177	-0.068	0	0.0555	0.2636	7.8672
At2g30840	2	15	68.77	6.4614	-0.0448	0	0.0256	0.2337	10.3525
At2g30840	4	13	55.4	7.8383	0.0487	0	0.0279	0.2636	7.8662
At2g30840	4	15	67.15	3.968	0.0352	0	0.0164	0.2521	10.4198
At2g30840	5	7	28.6	8.4206	0.0462	0	0.0289	0.2925	5.2945
At2g30840	5	11	53.75	4.9773	0.0372	0	0.0187	0.2823	6.3059
At2g30980	2	10	42.44	9.1506	-0.0176	0	0.0376	0.1521	184.879
At2g30980	2	12	55.87	5.2409	-0.0143	0	0.0233	0.1379	237.843
At2g30980	3	15	64.5	4.582	0.012	0	0.0192	0.1238	198.034
At2g30980	3	17	76.48	10.5299	0.0182	0	0.0447	0.1493	187.368
At2g30980	4	4	14.7	13.3288	0.0251	0	0.0557	0.1528	184.419
At2g30980	4	7	32.68	9.1312	-0.0211	0	0.0417	0.1573	185.206
At2g30930	1	2	5.05	7.7593	-0.0347	0	0.0316	0.1689	5.7742
[truncated: 96,016 more rows]
